# Supplementary material for: Commercial head-mounted display virtual reality for upper extremity rehabilitation in chronic stroke: a single-case design study
Source: PubMed Central journal article supplement (PMC7686731; doi:10.1186/s12984-020-00788-x), 2020-11-23

# P1 ARAT

ARAT MCID = 5.7

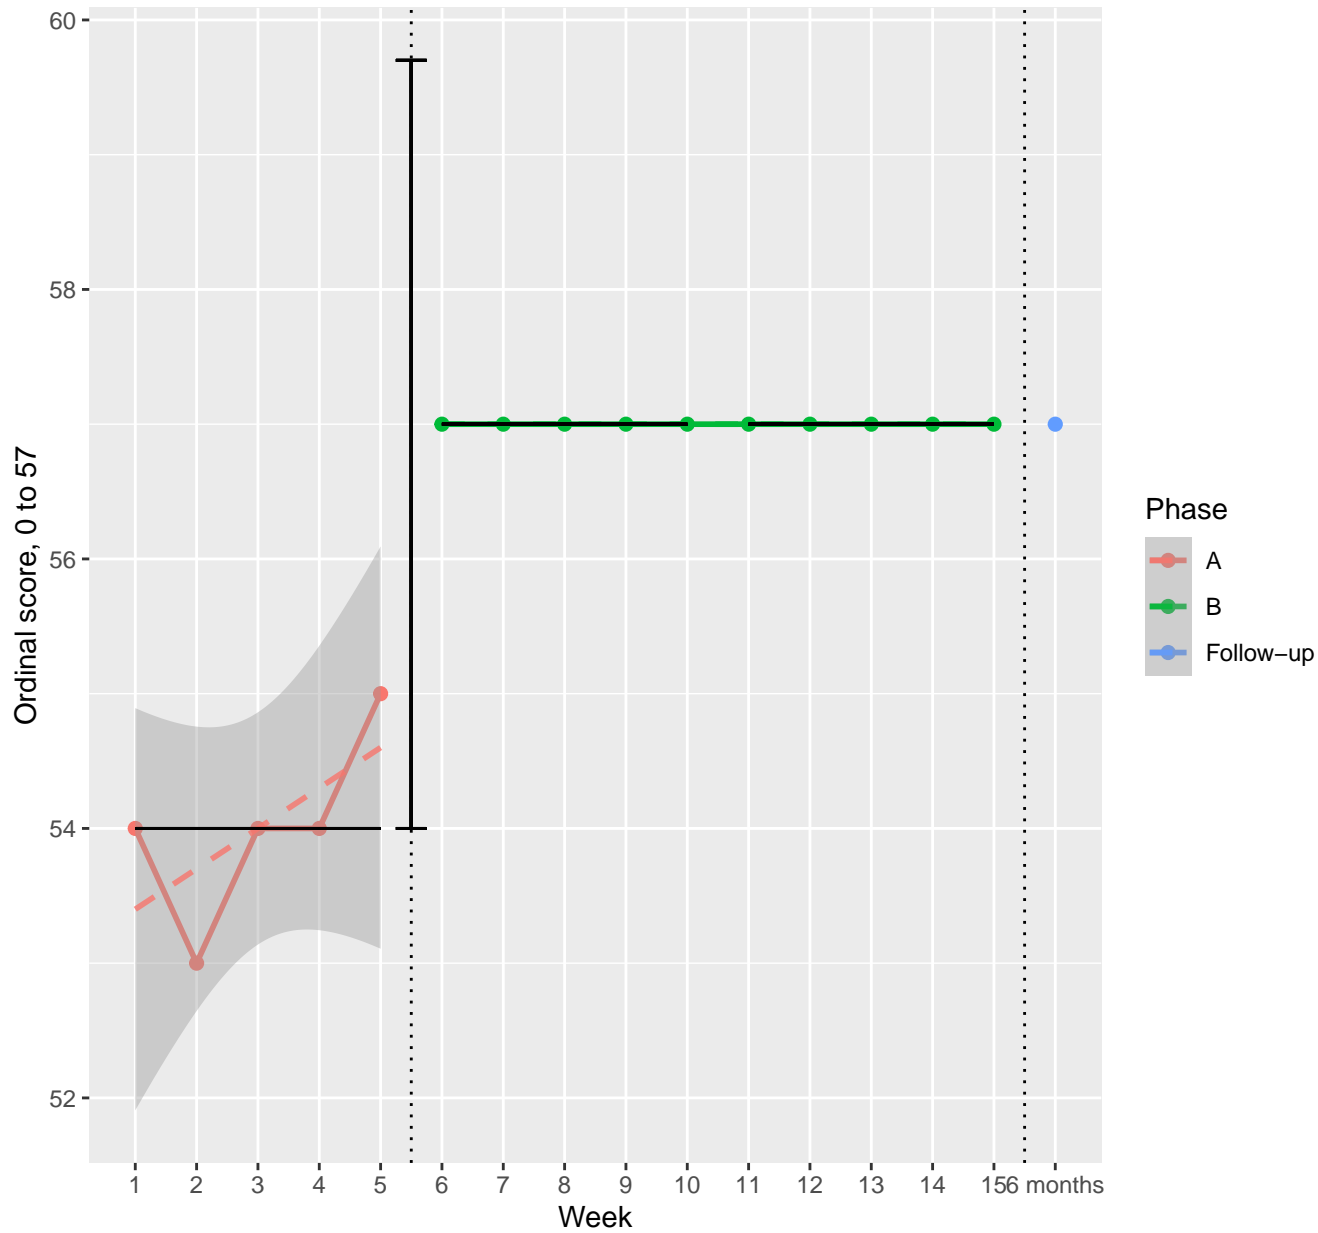

P1 BBT

BBT MCD = 5.5

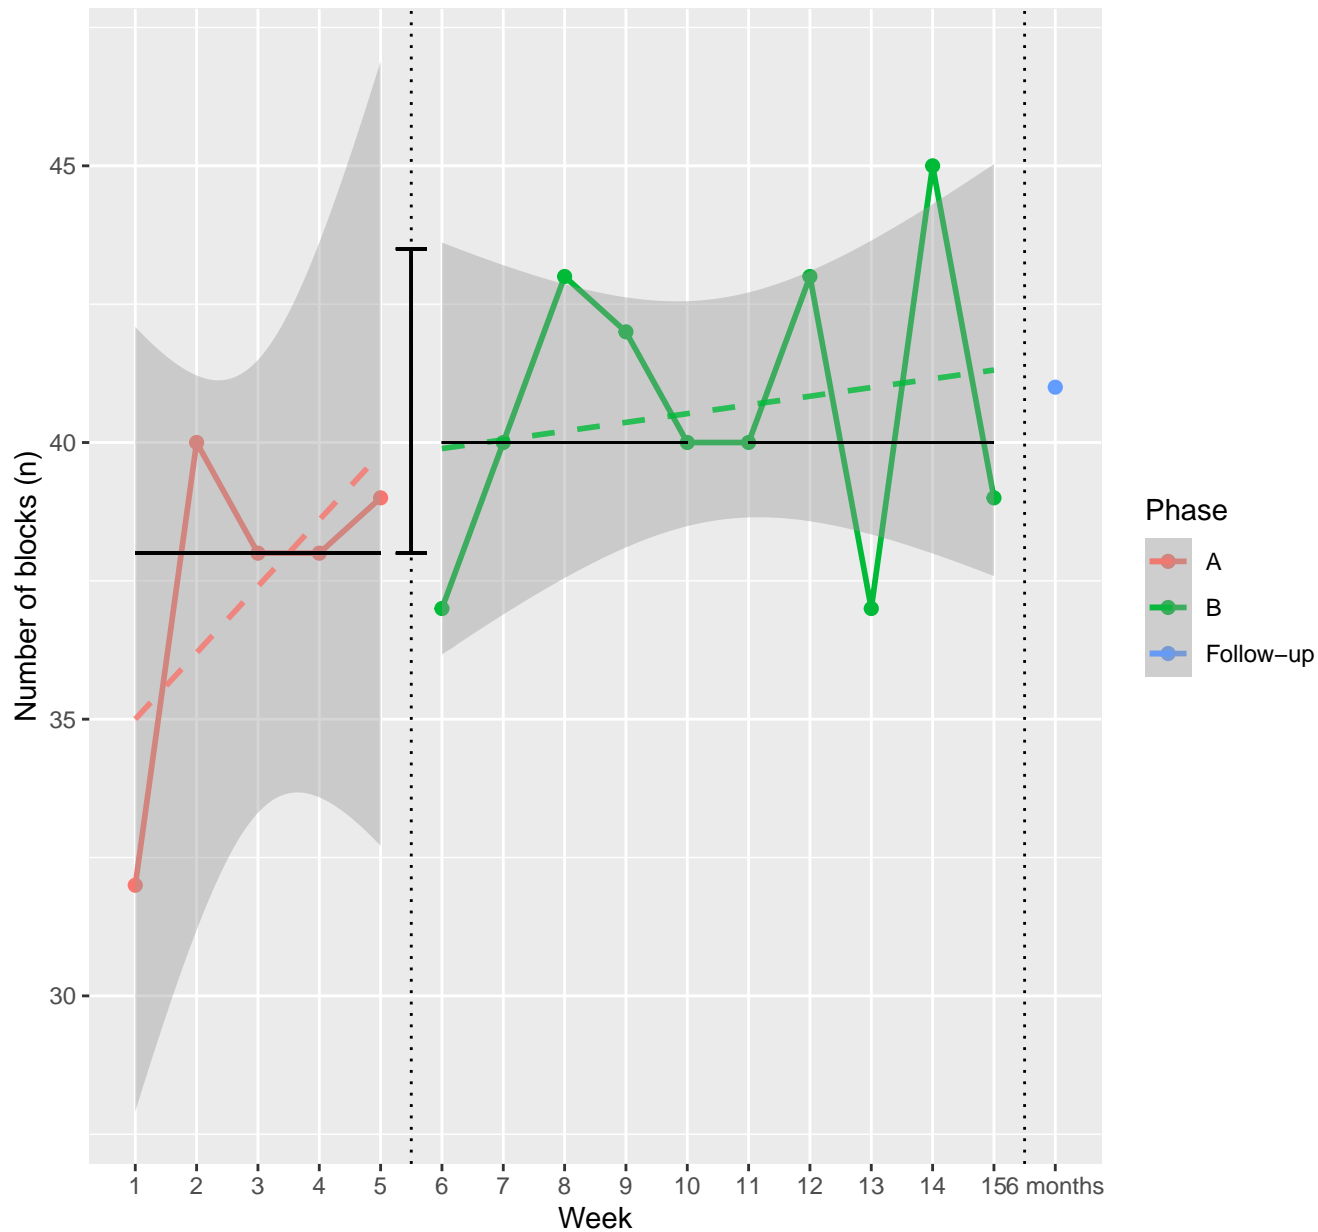

# P1 ABILHAND

ABILHAND MCID = 0.26–0.35

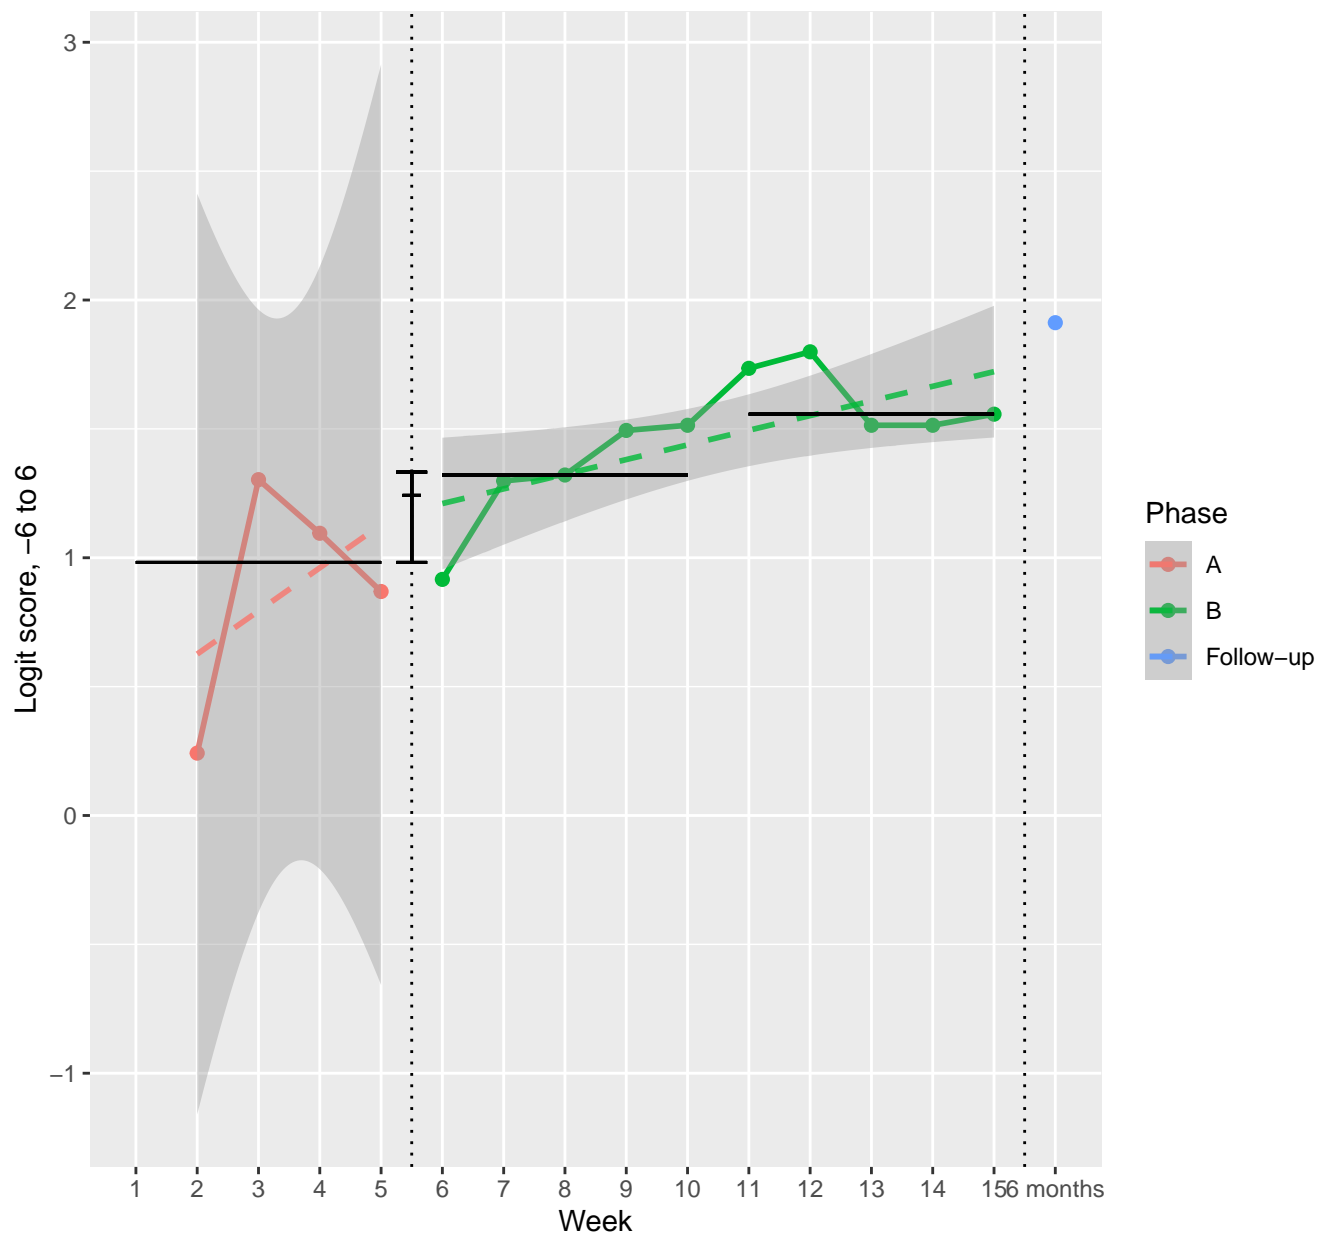

# P1 KinTMT

KinTMT MCID = 2.4

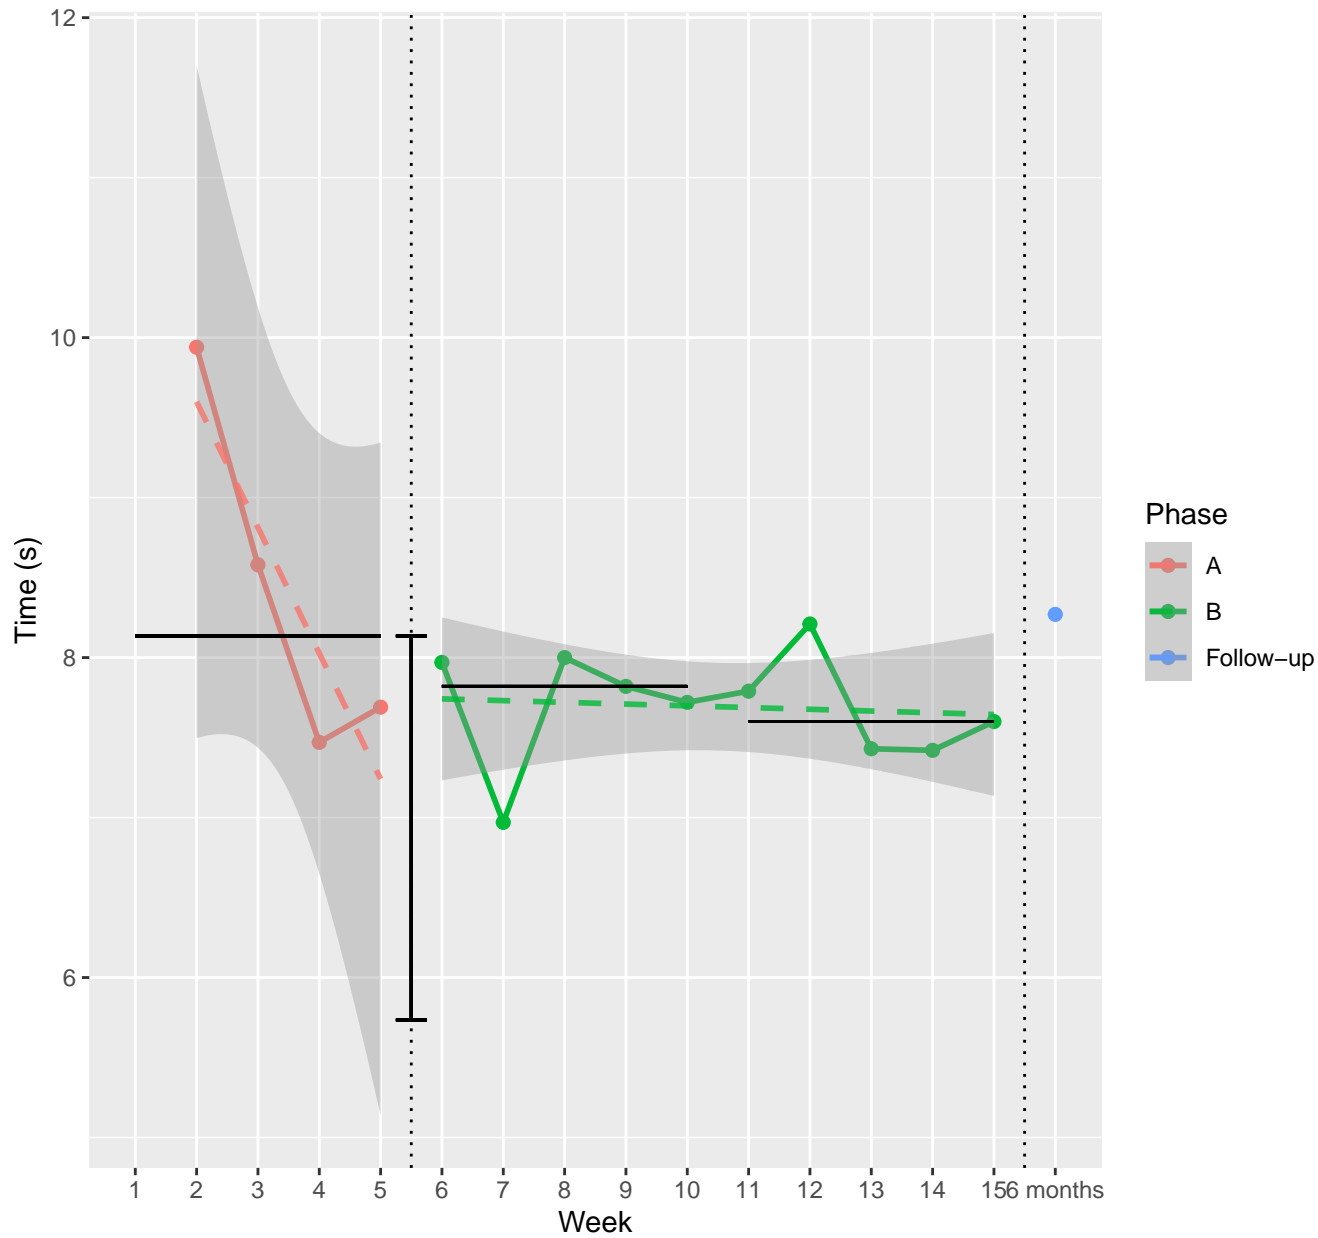

# P1 KinNMU

KinNMU MCID = 3.3

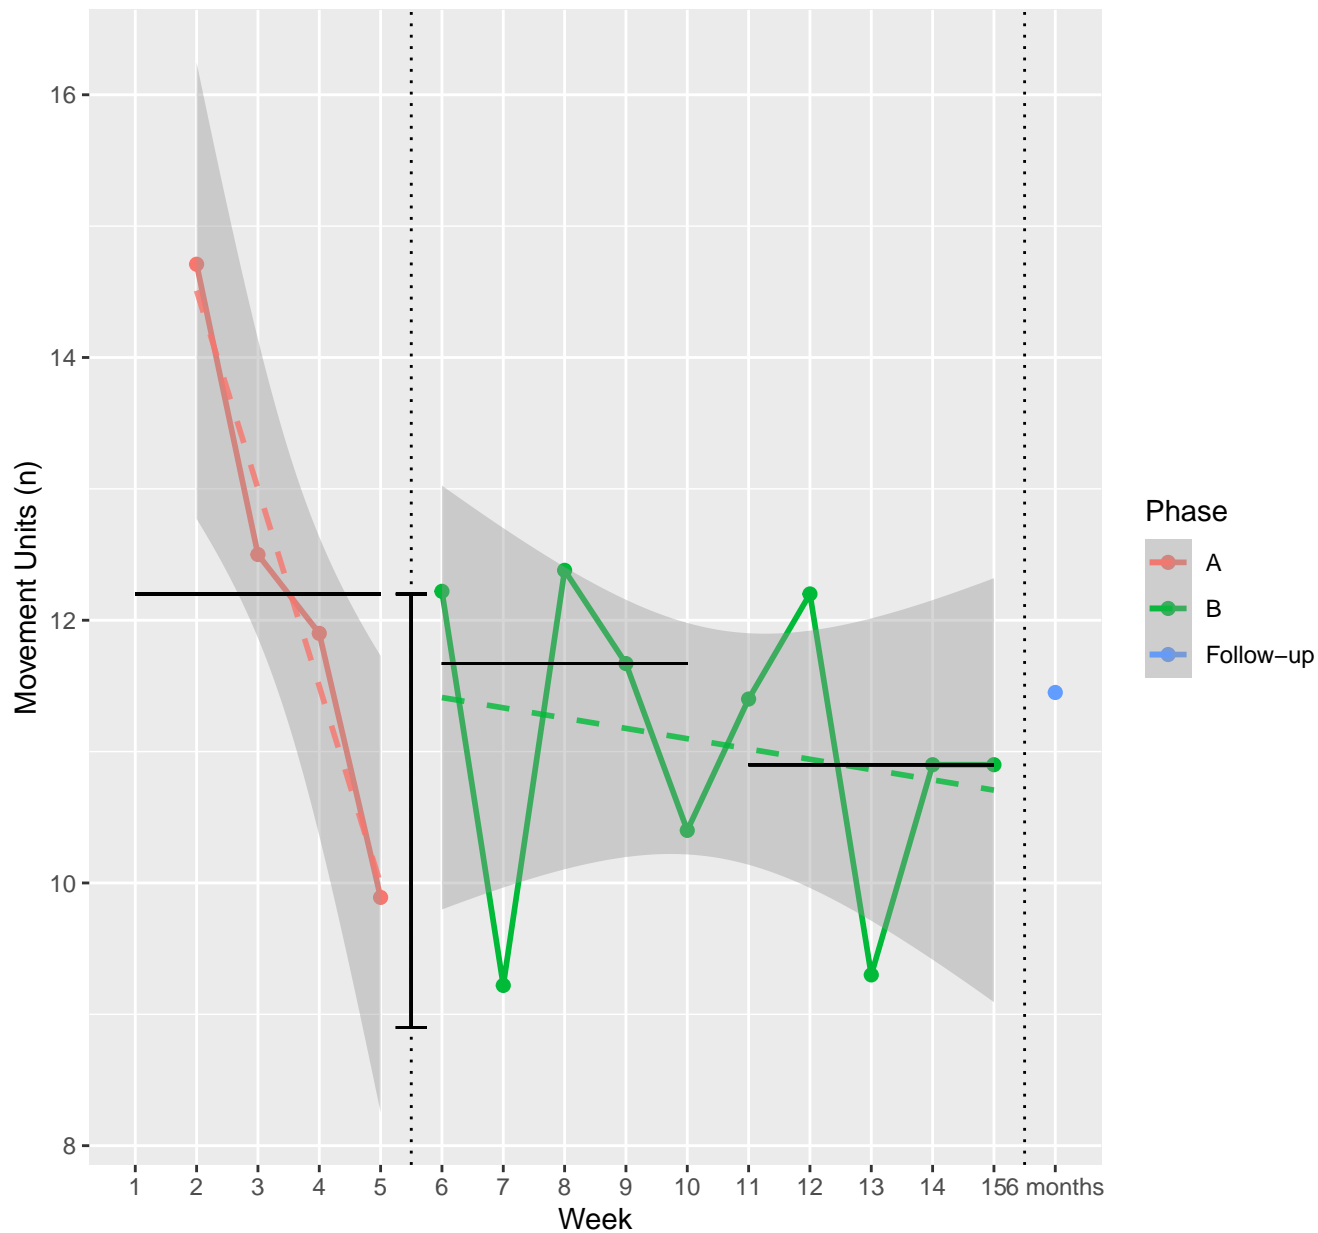

P1 KinTD

KinTD MCID = 2.0

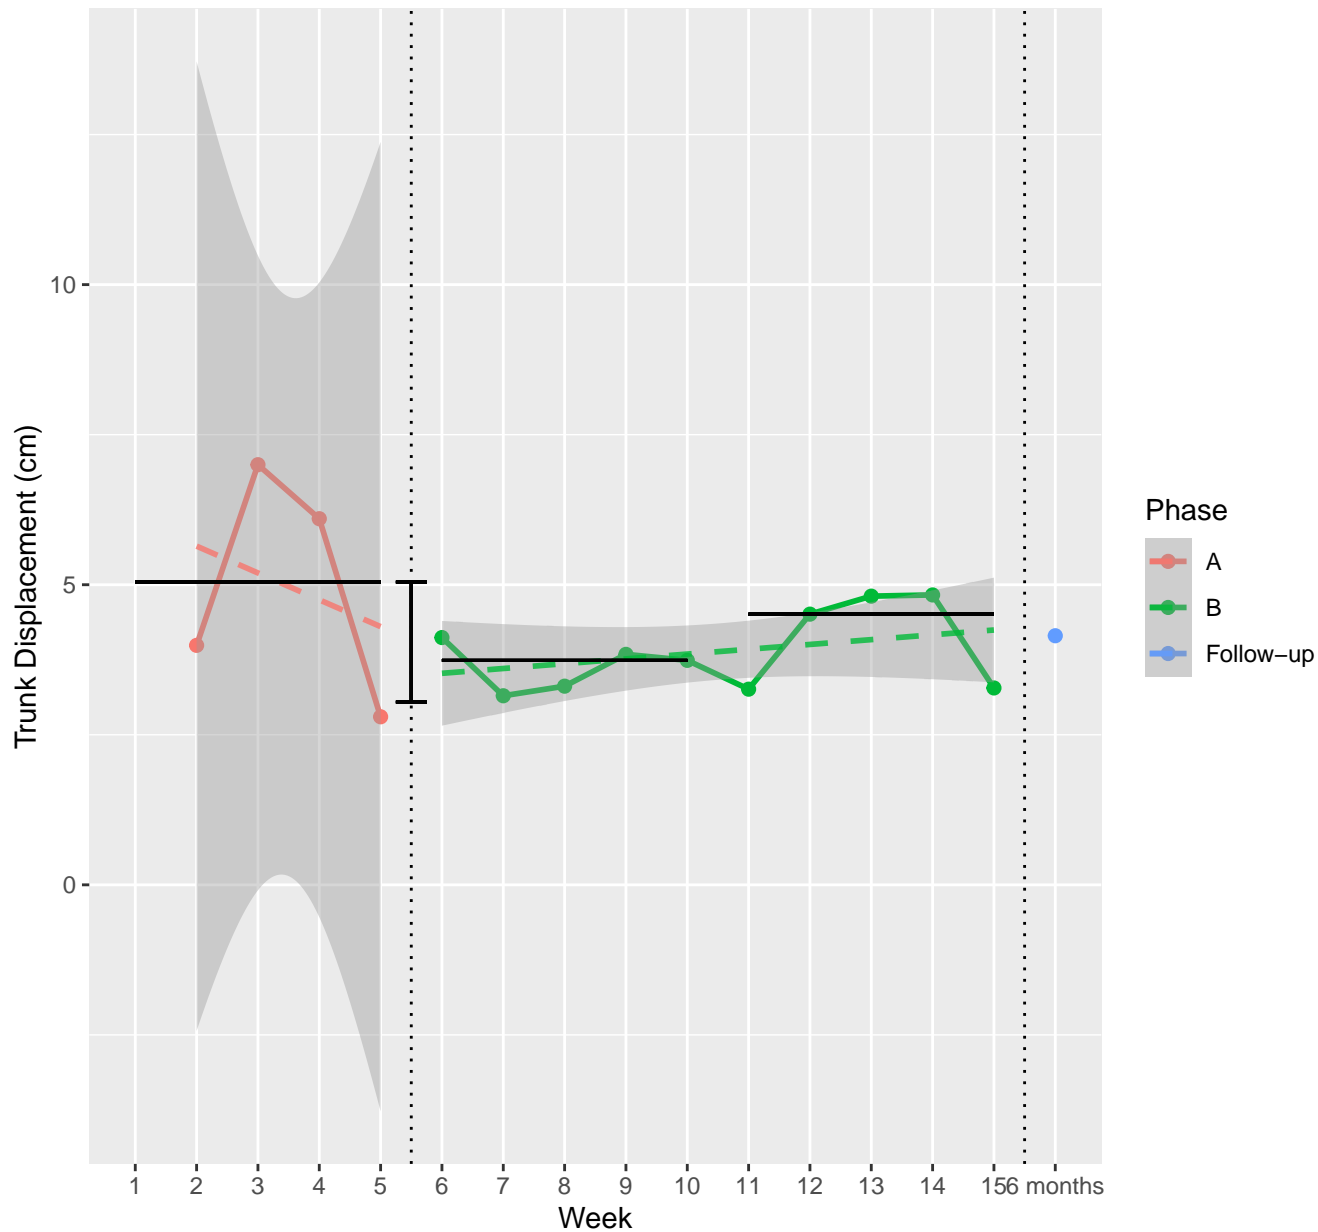

# P2 ARAT

ARAT MCID = 5.7

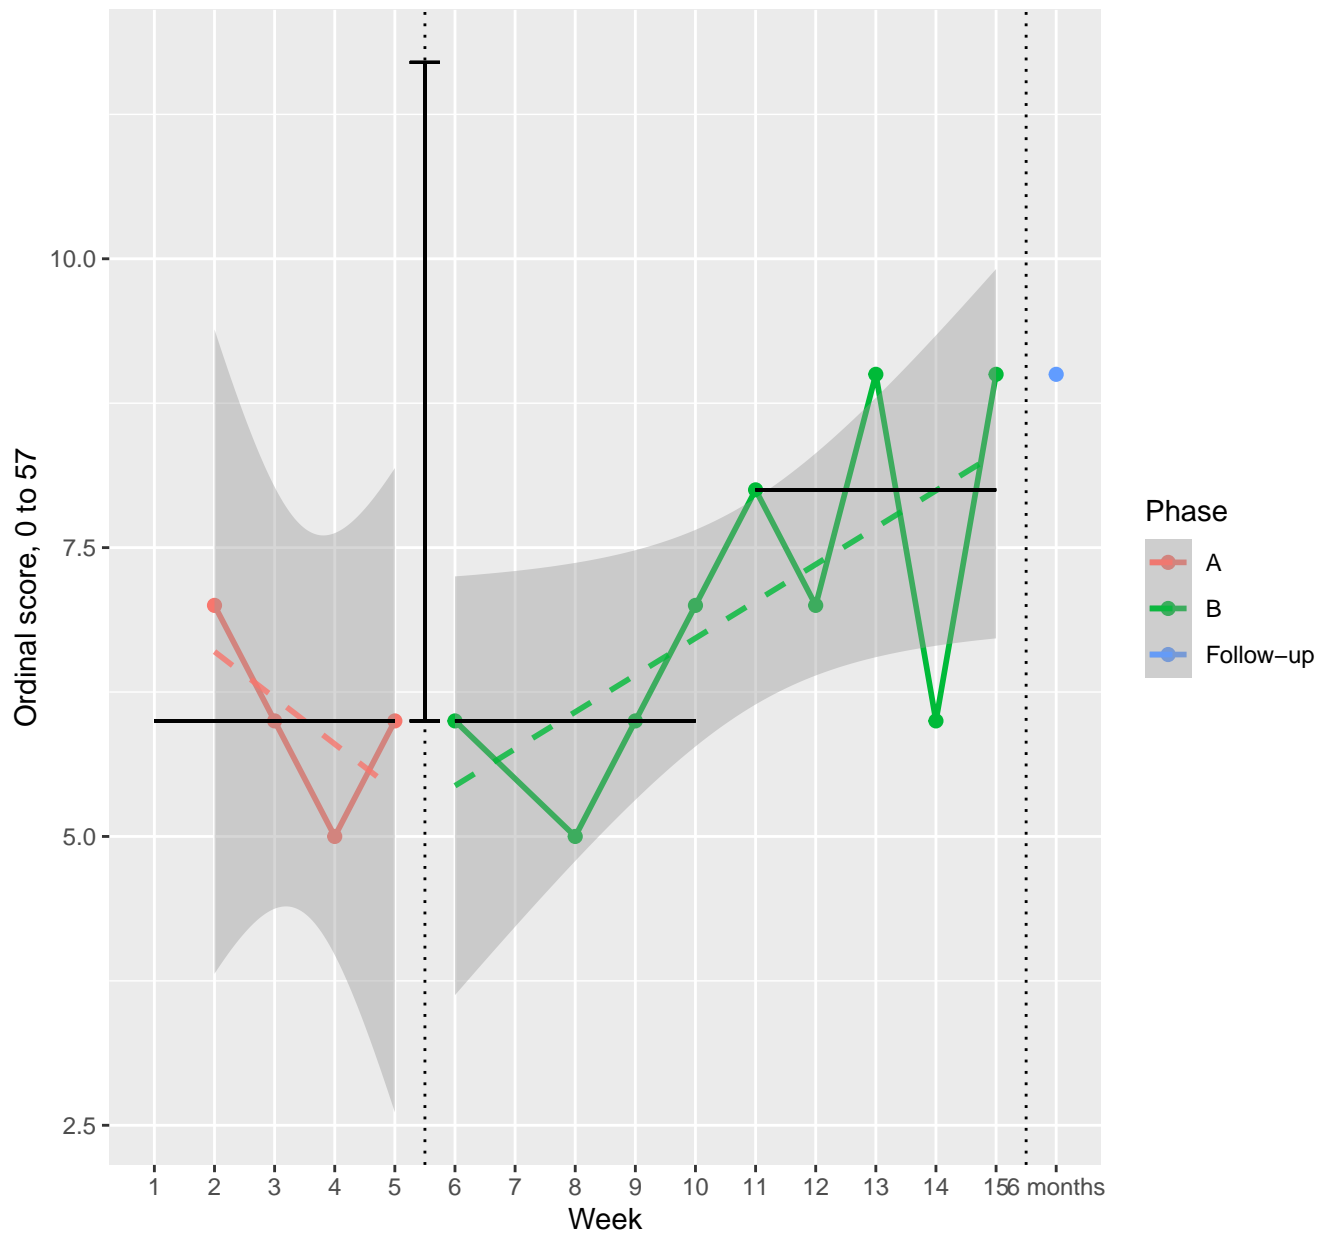

# P2 BBT

BBT MCD = 5.5

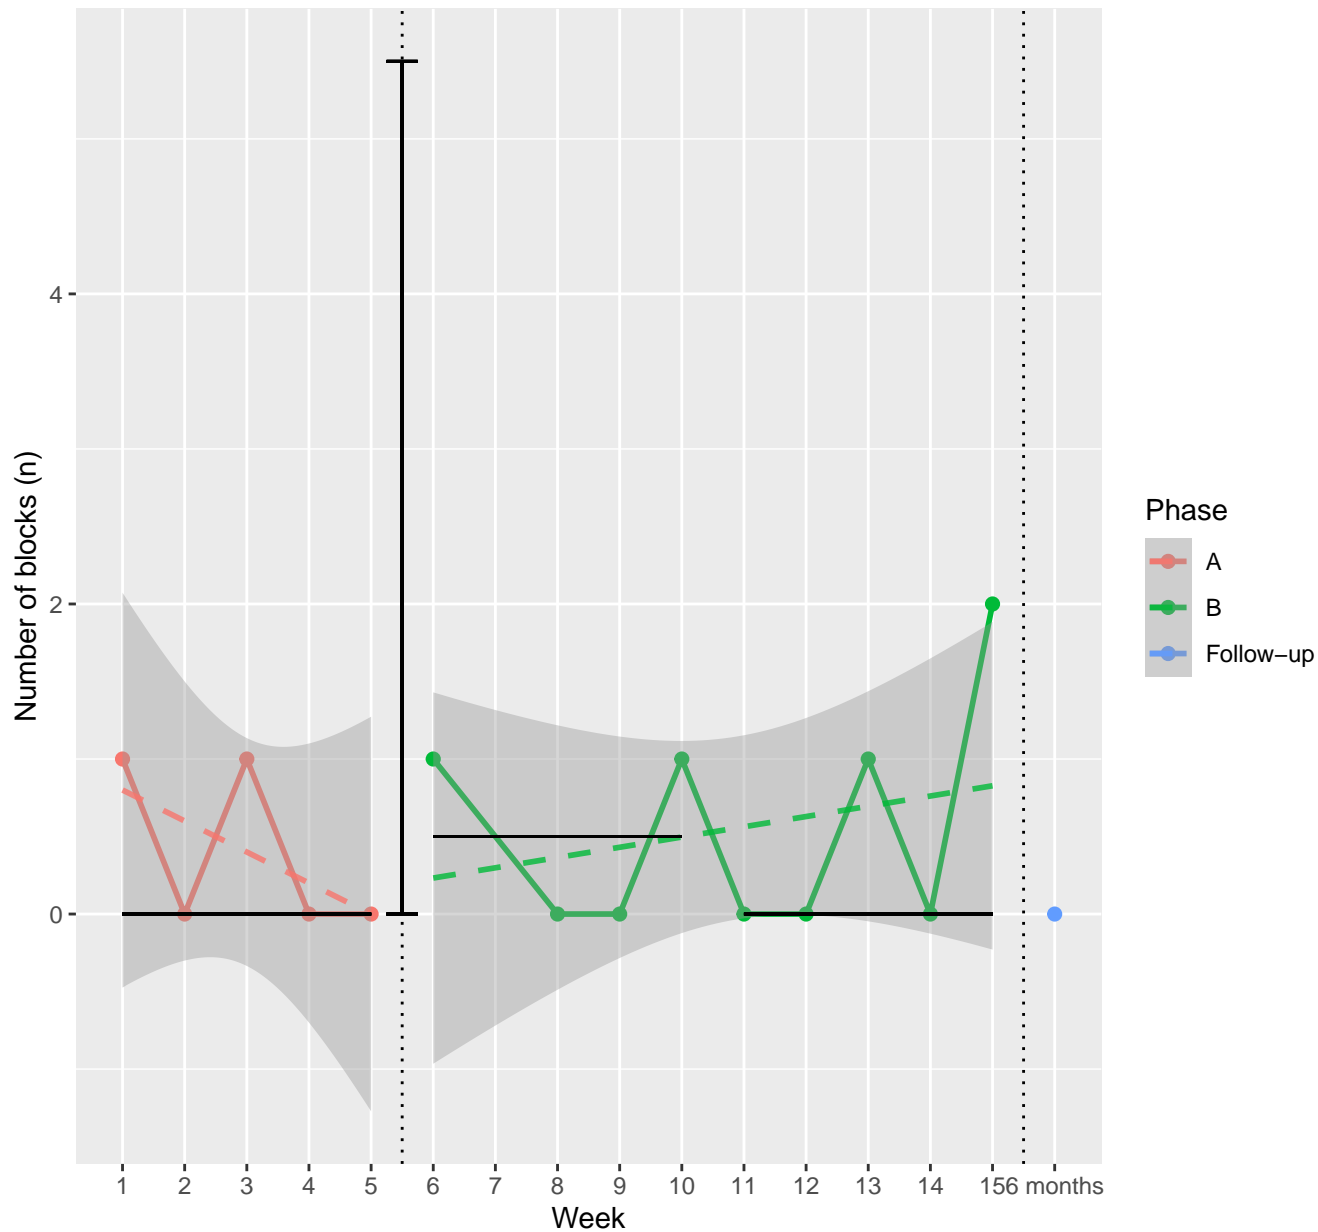



# P2 ABILHAND

ABILHAND MCID = 0.26–0.35

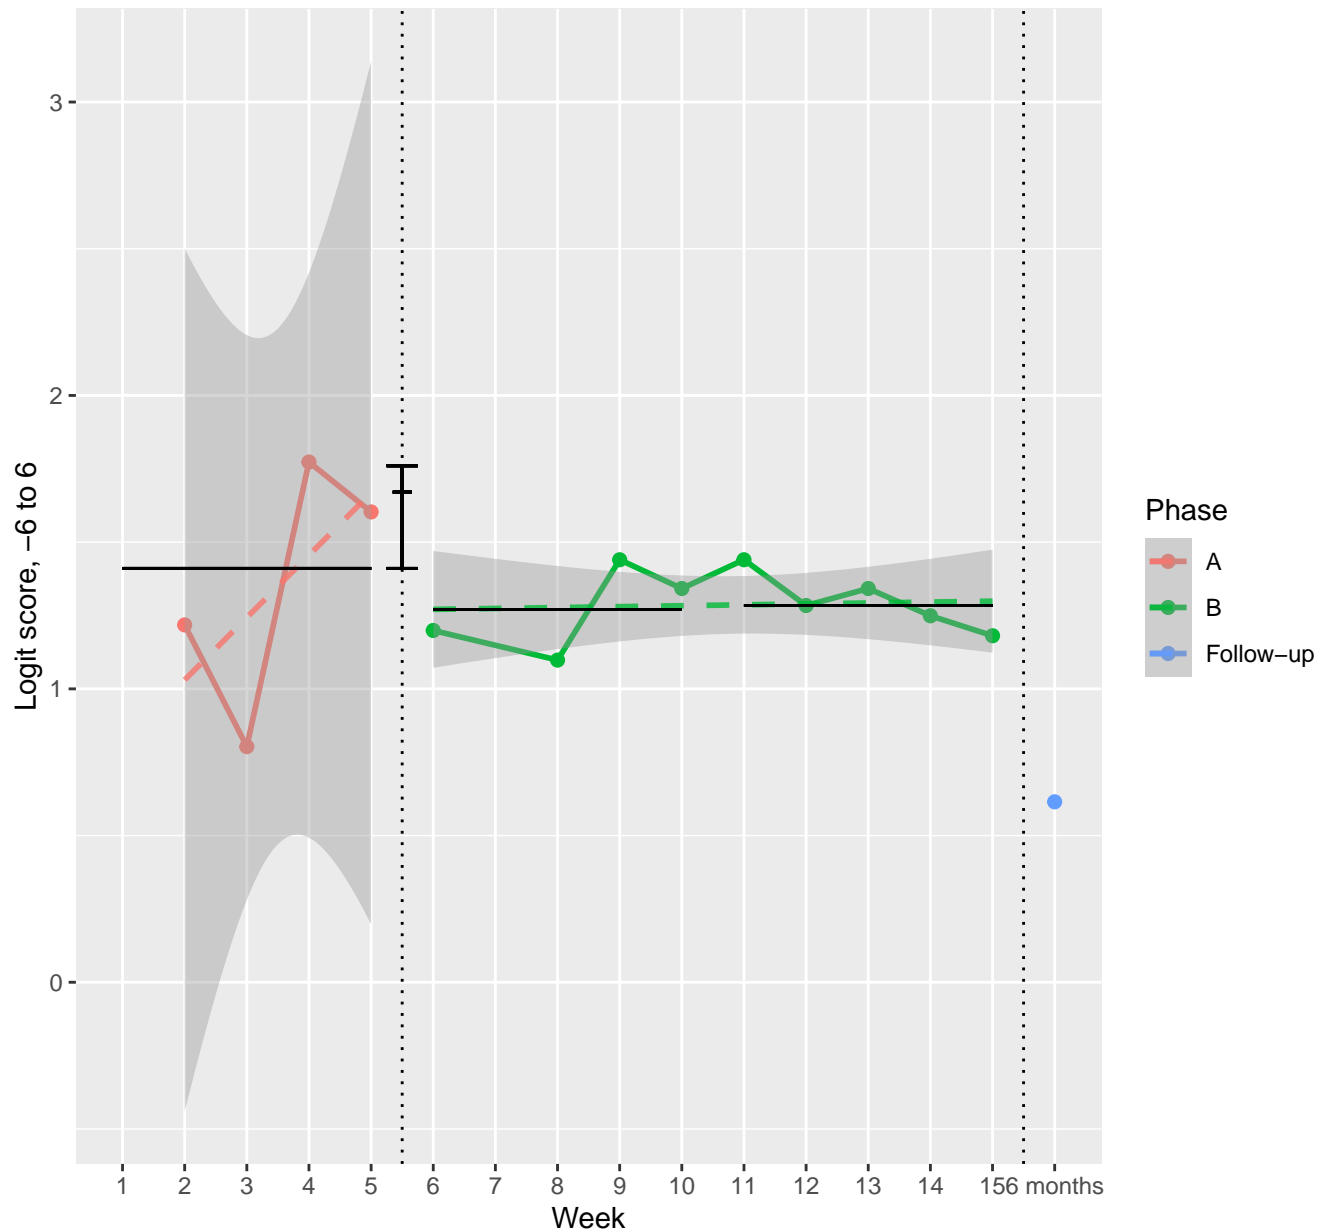

# P3 ARAT

ARAT MCID = 5.7

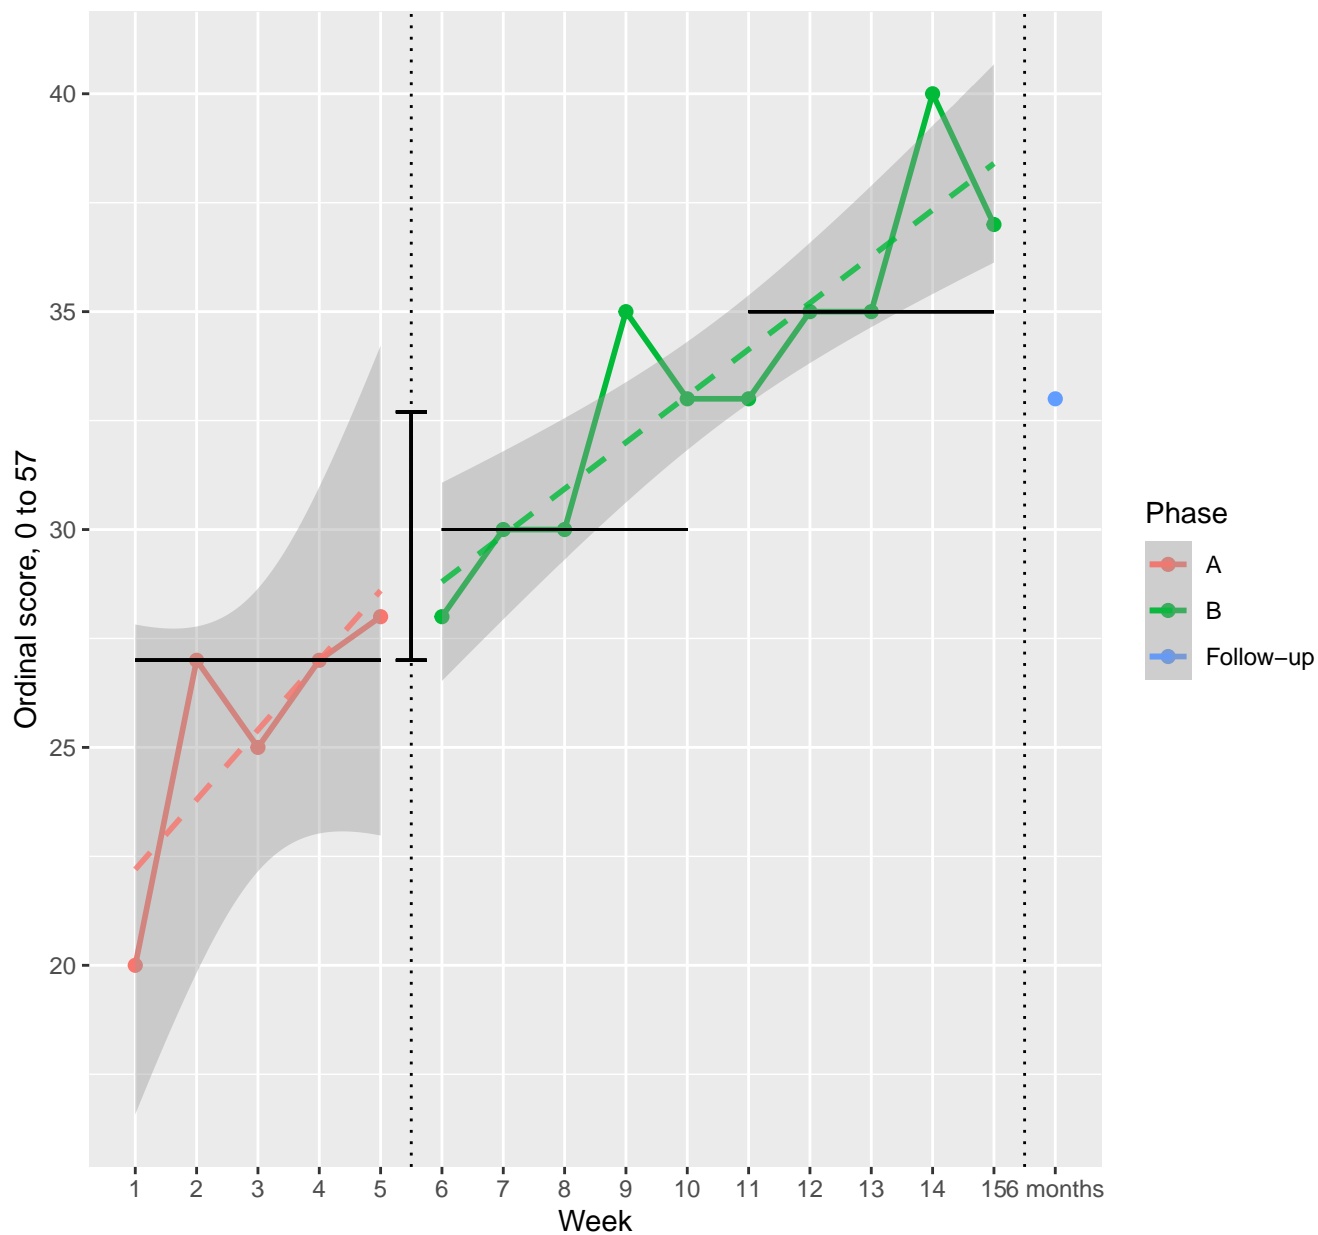

# P3 BBT

BBT MCD = 5.5

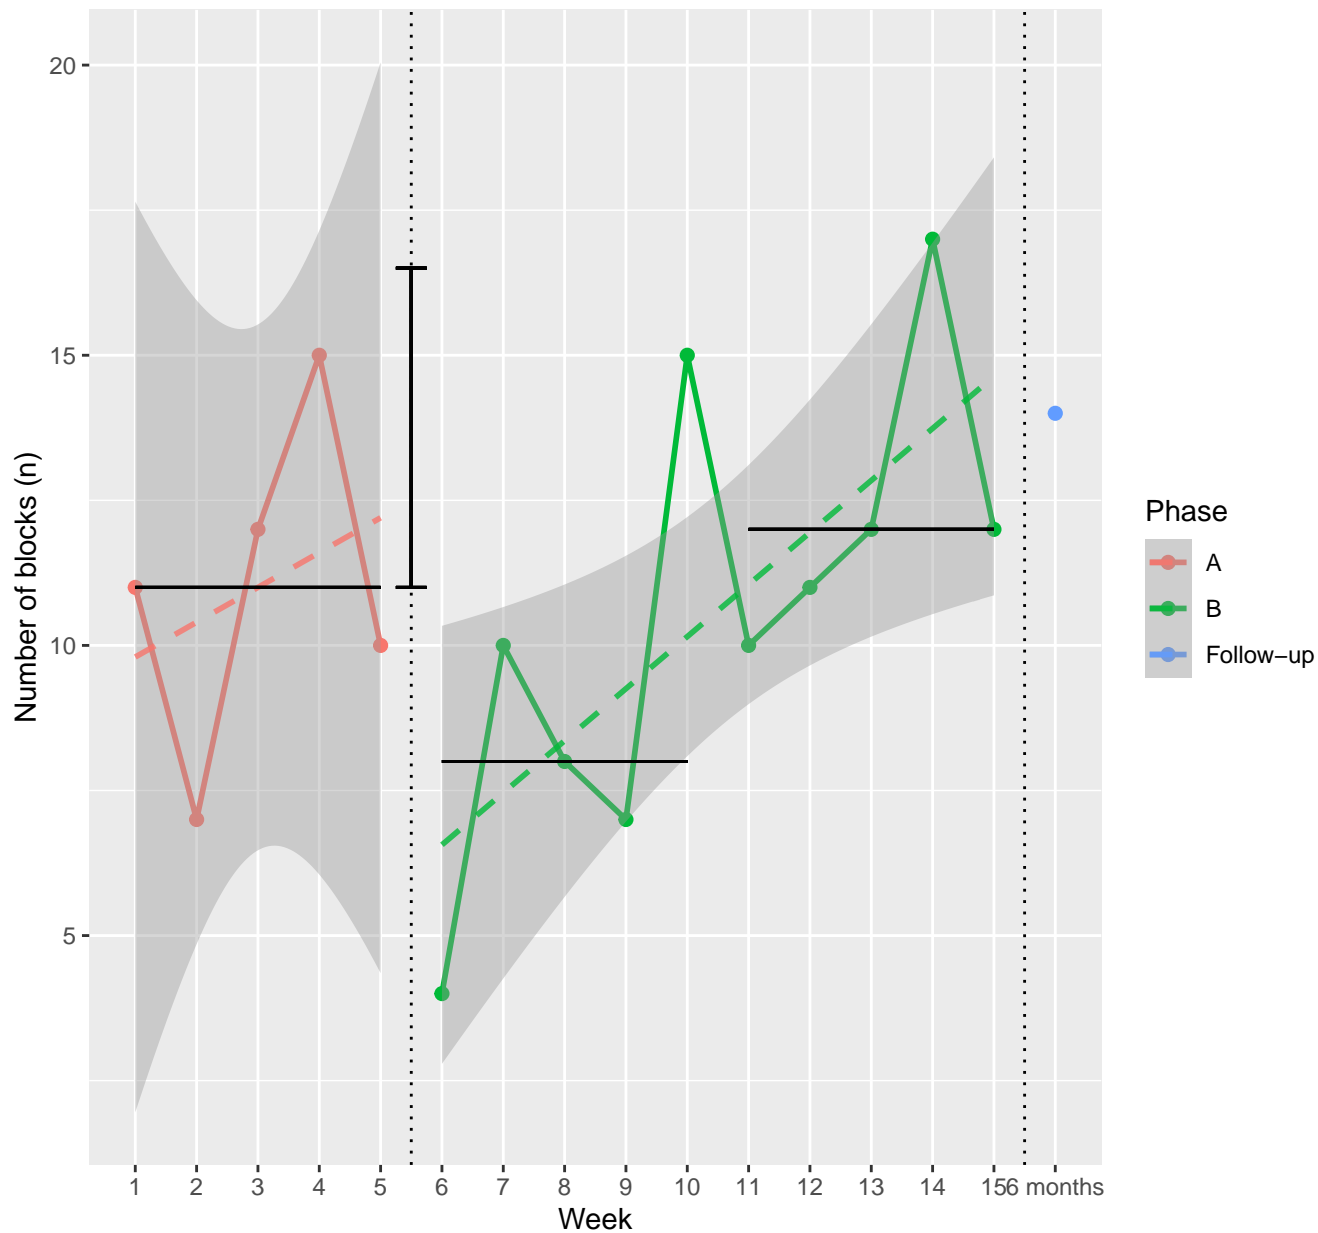

# P3 ABILHAND

ABILHAND MCID = 0.26–0.35

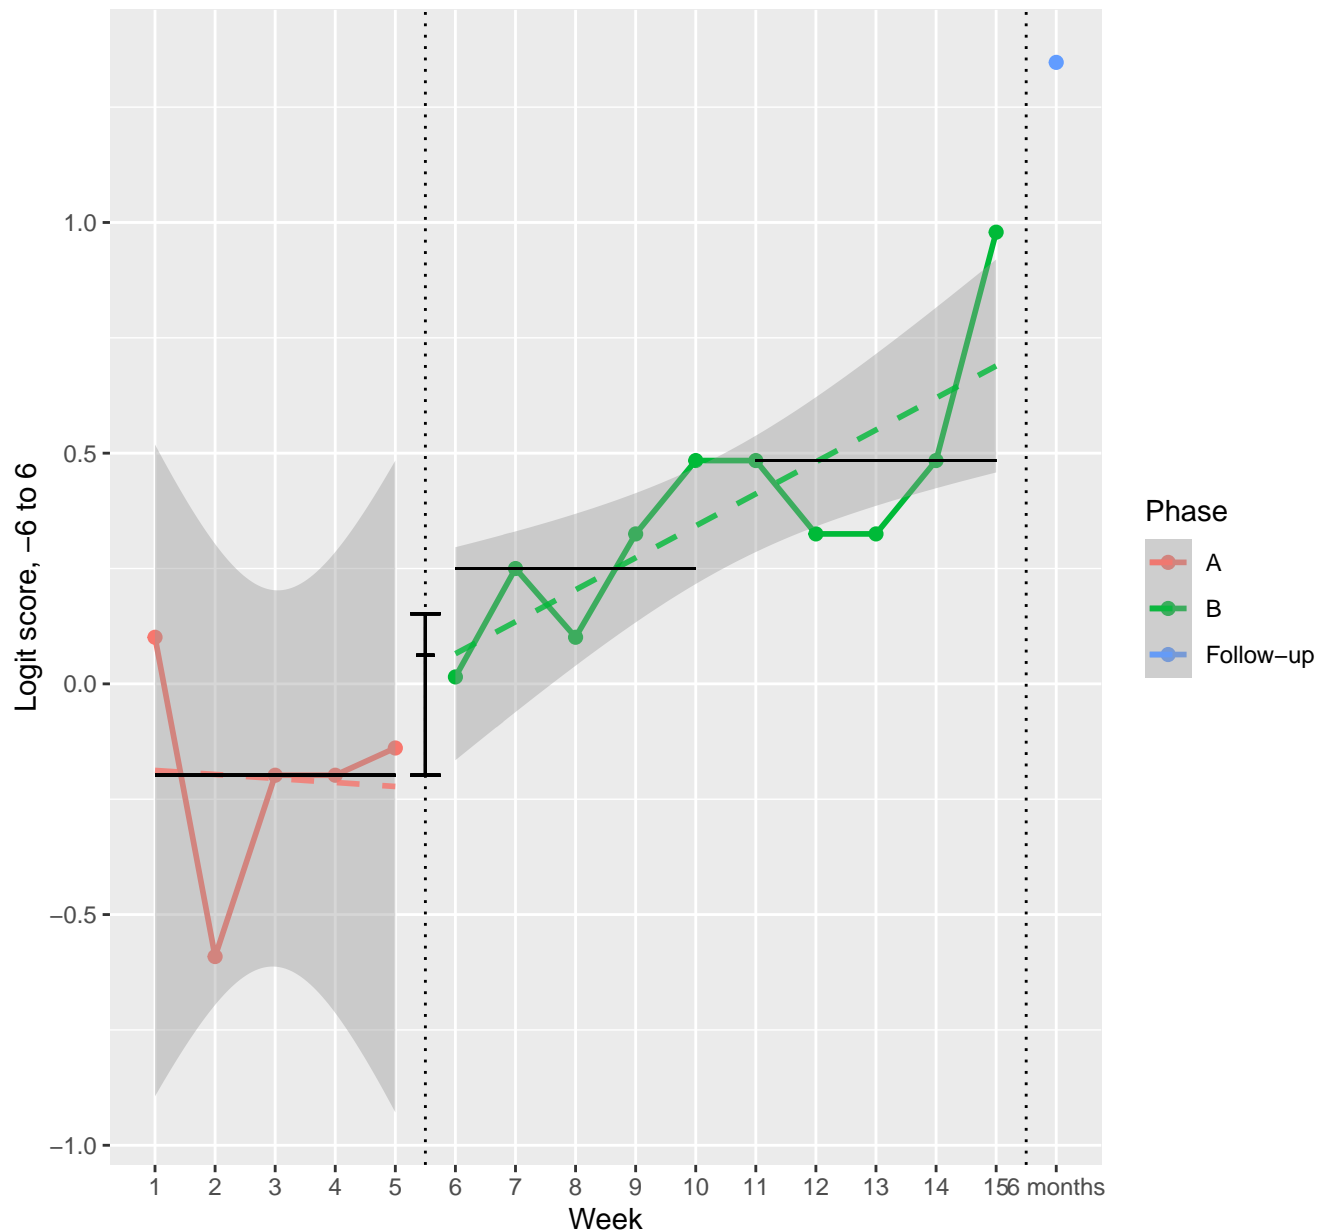

# P3 KinTMT

KinTMT MCID = 2.4

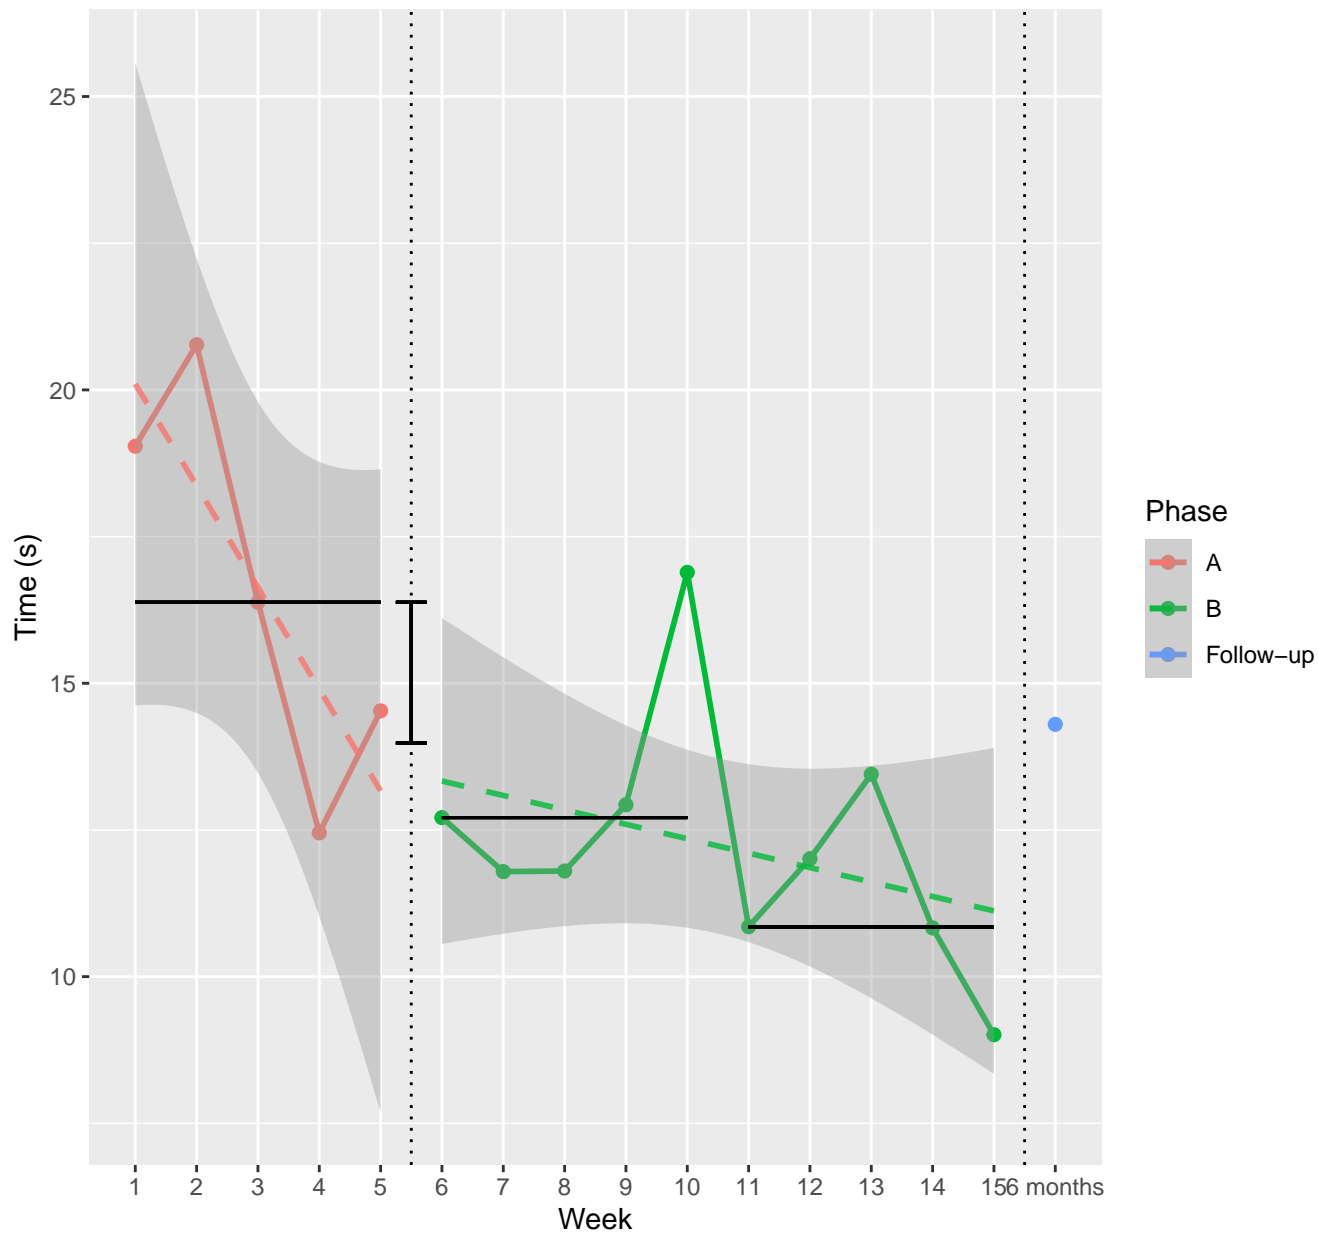

# P3 KinNMU

KinNMU MCID = 3.3

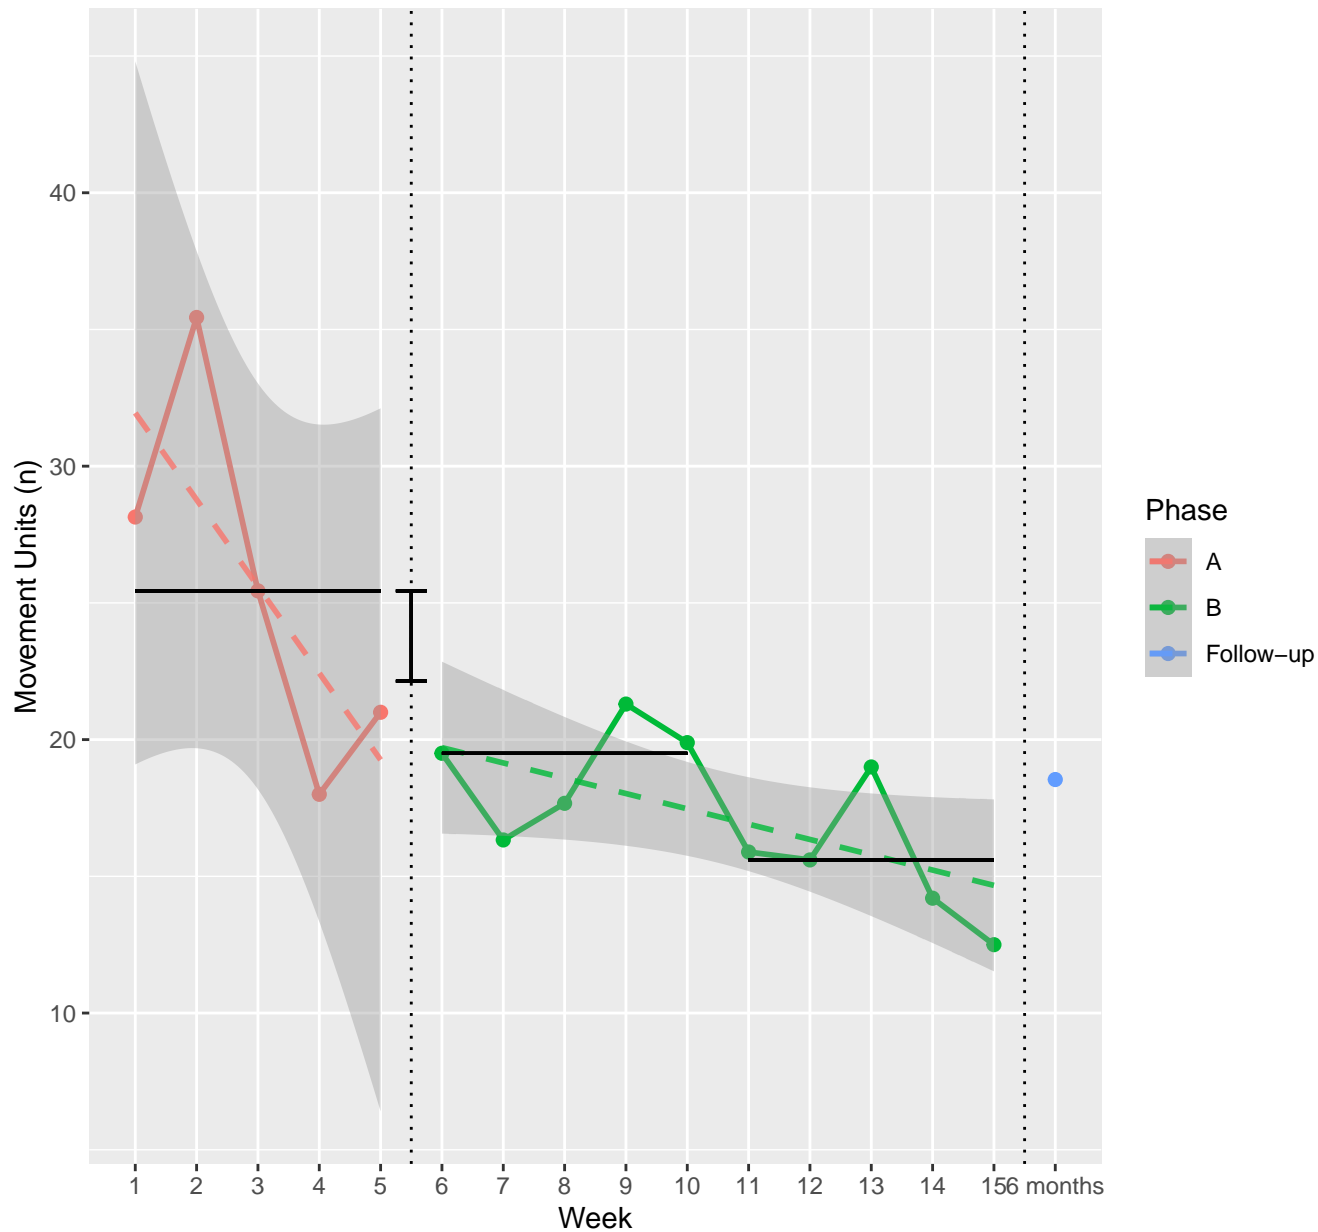

# P3 KinTD

KinTD MCID = 2.0

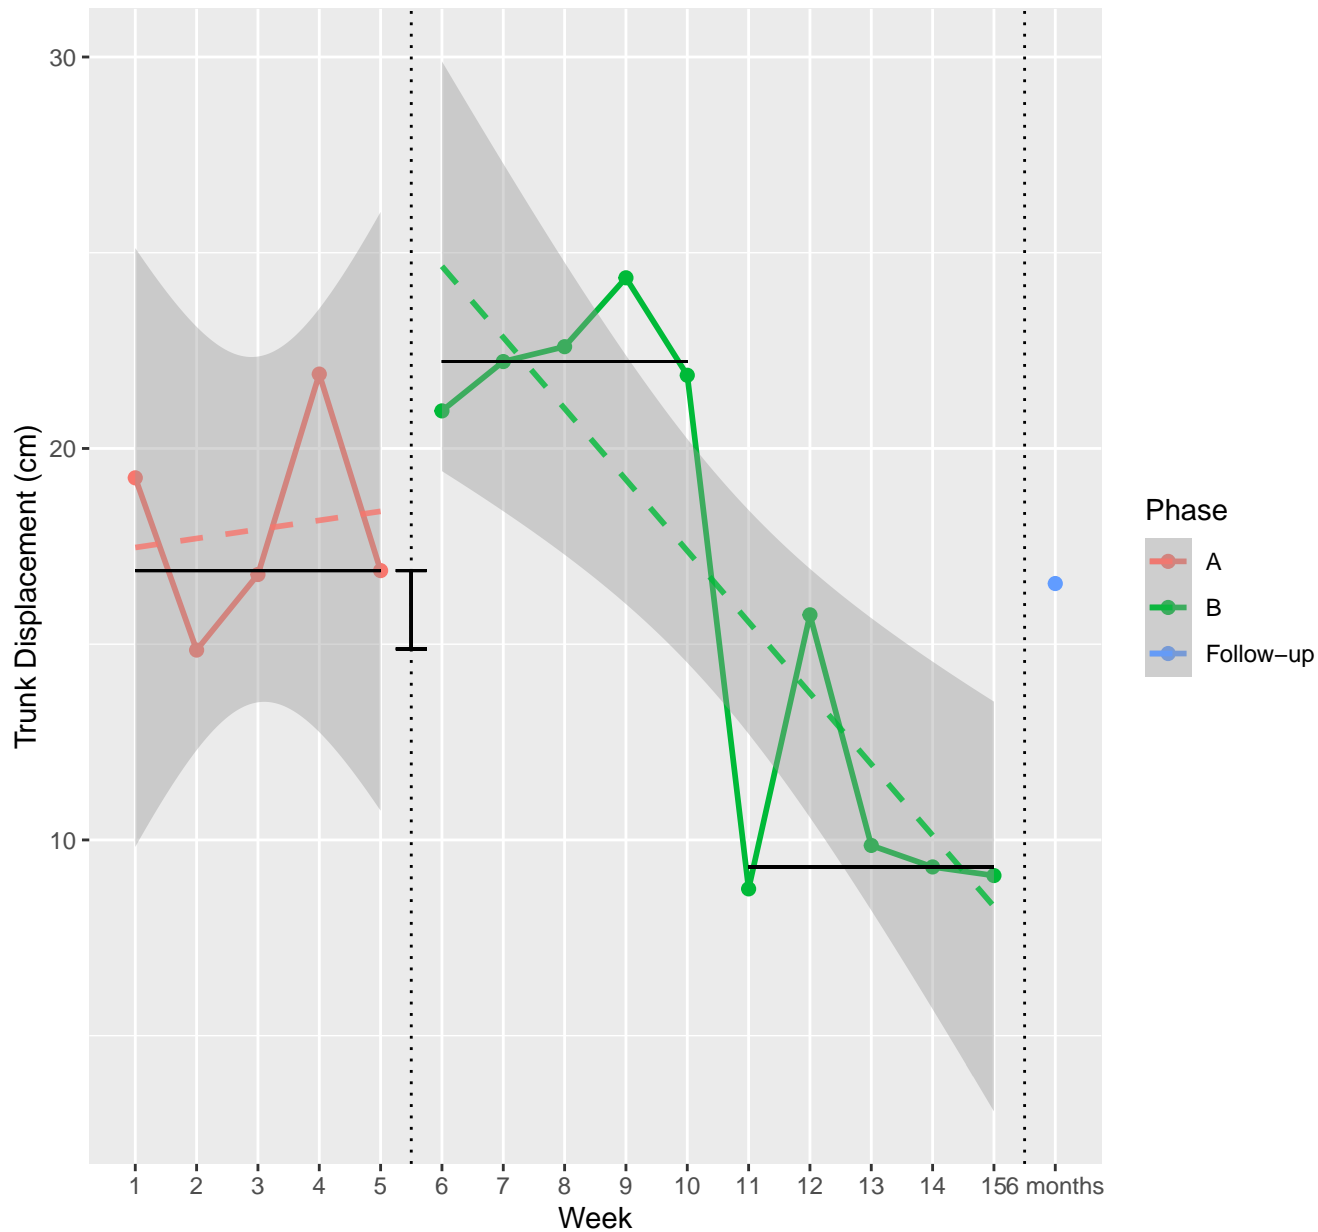

# P4 ARAT

ARAT MCID = 5.7

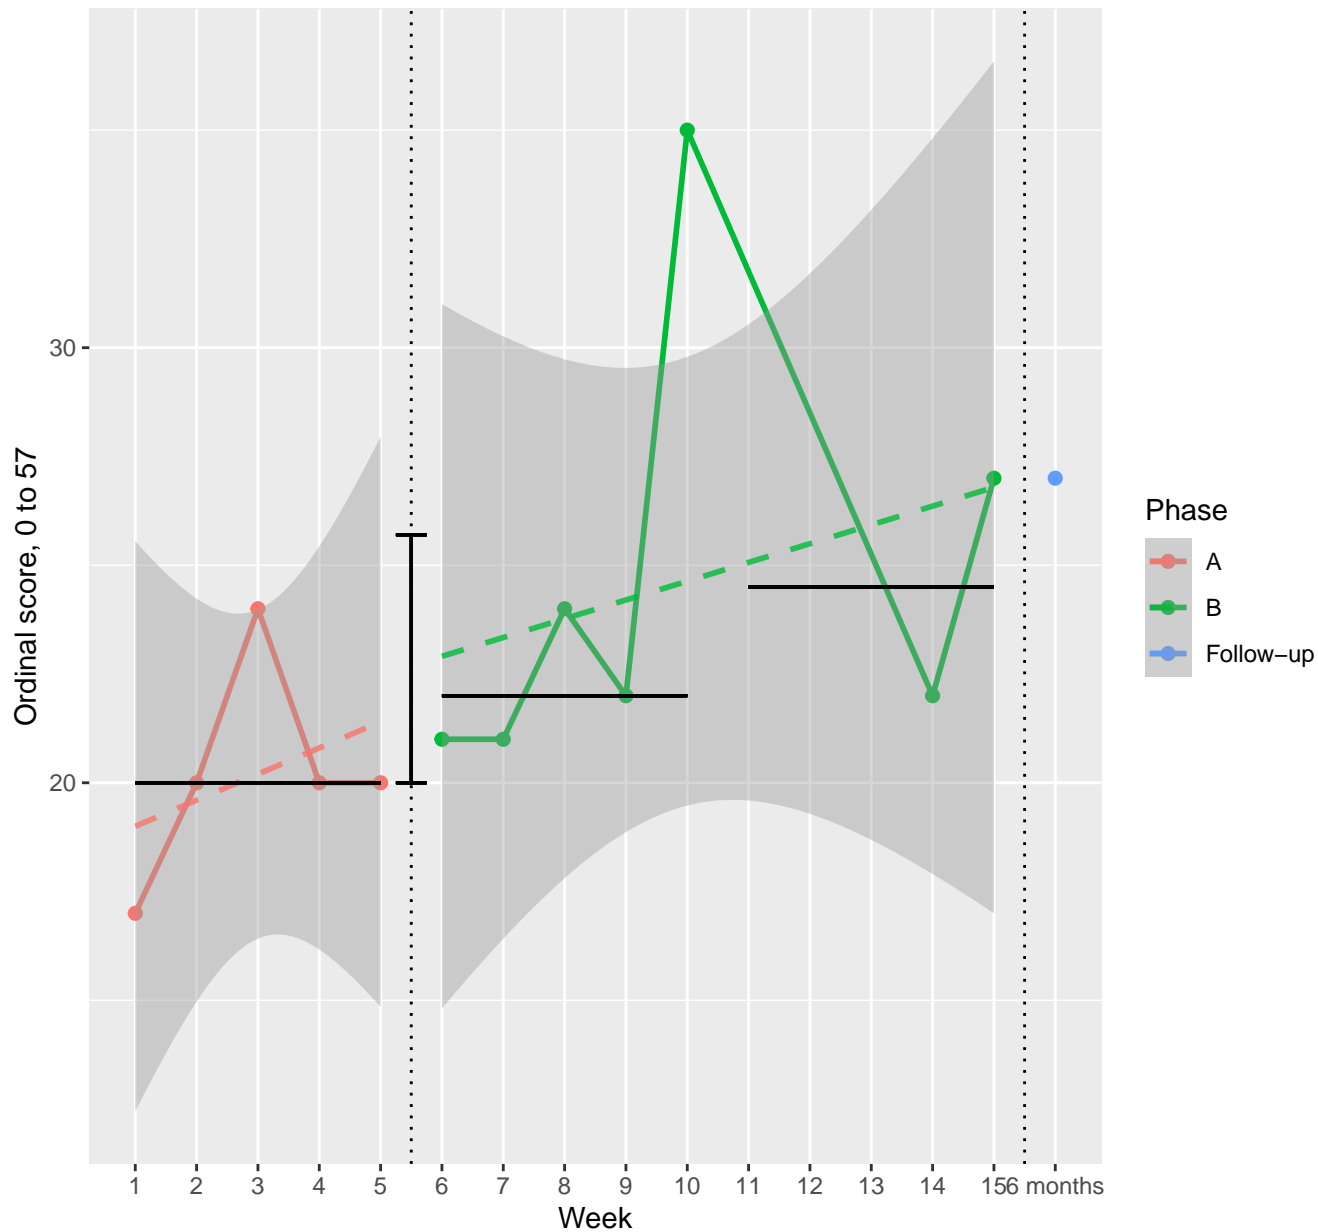



# P4 BBT

BBT MCD = 5.5

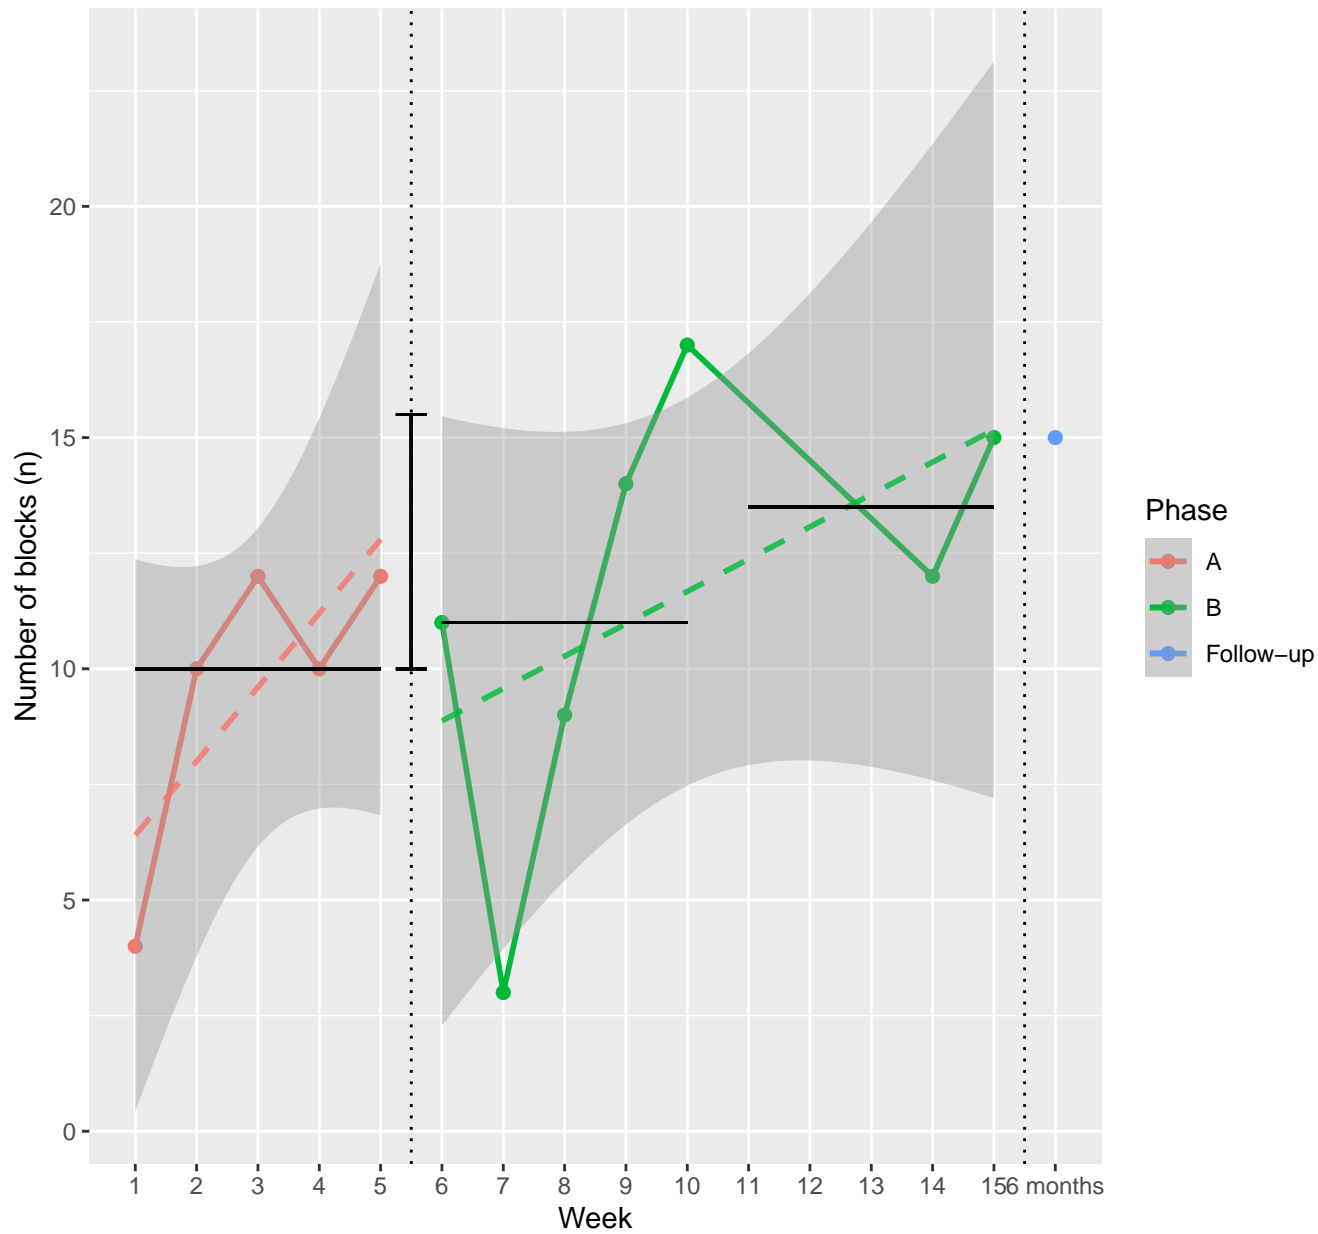

# P4 ABILHAND

ABILHAND MCID = 0.26–0.35

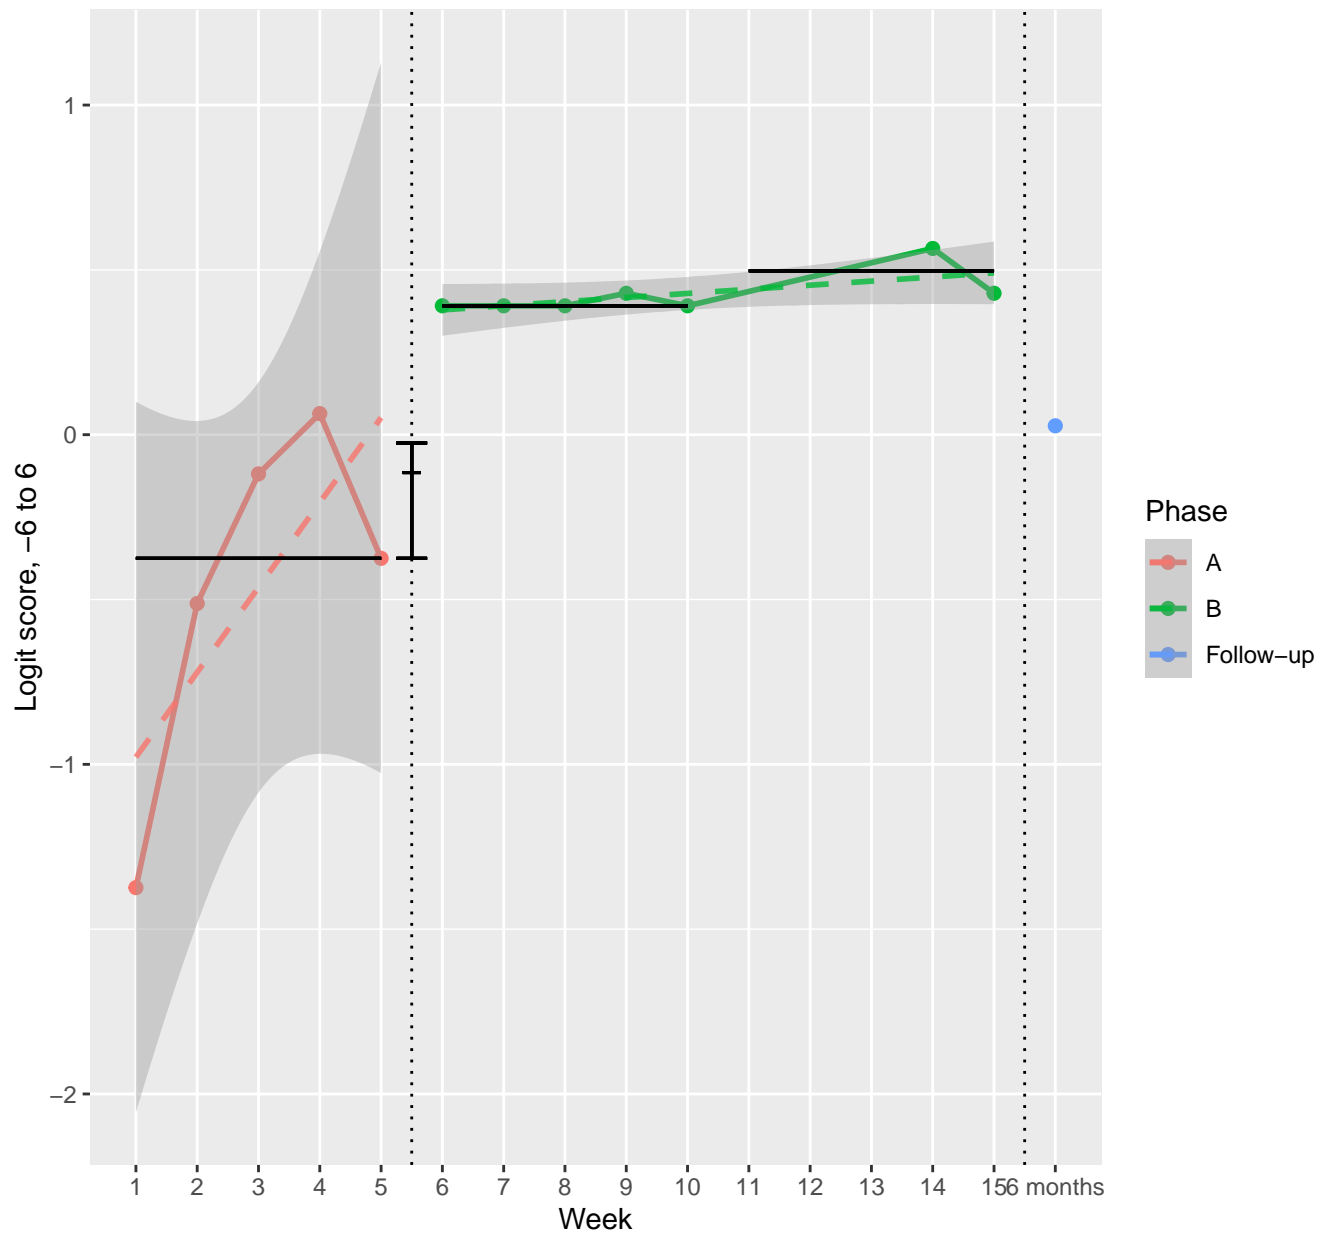

# P5 ARAT

ARAT MCID = 5.7

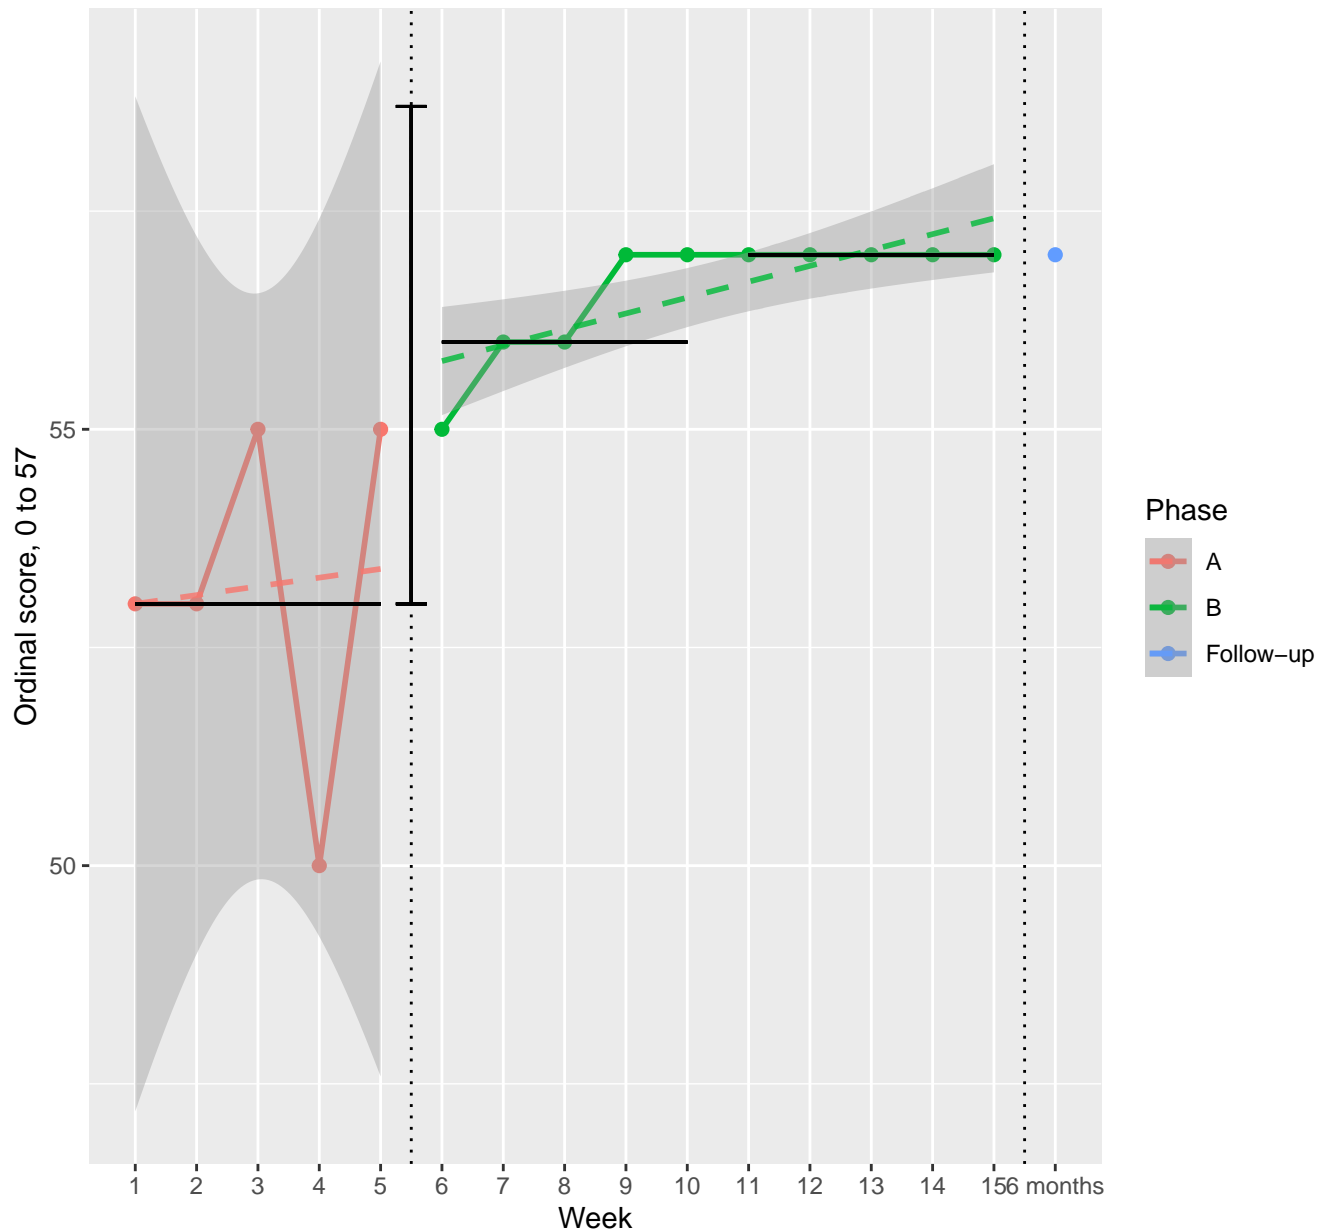

# P5 BBT

BBT MCD = 5.5

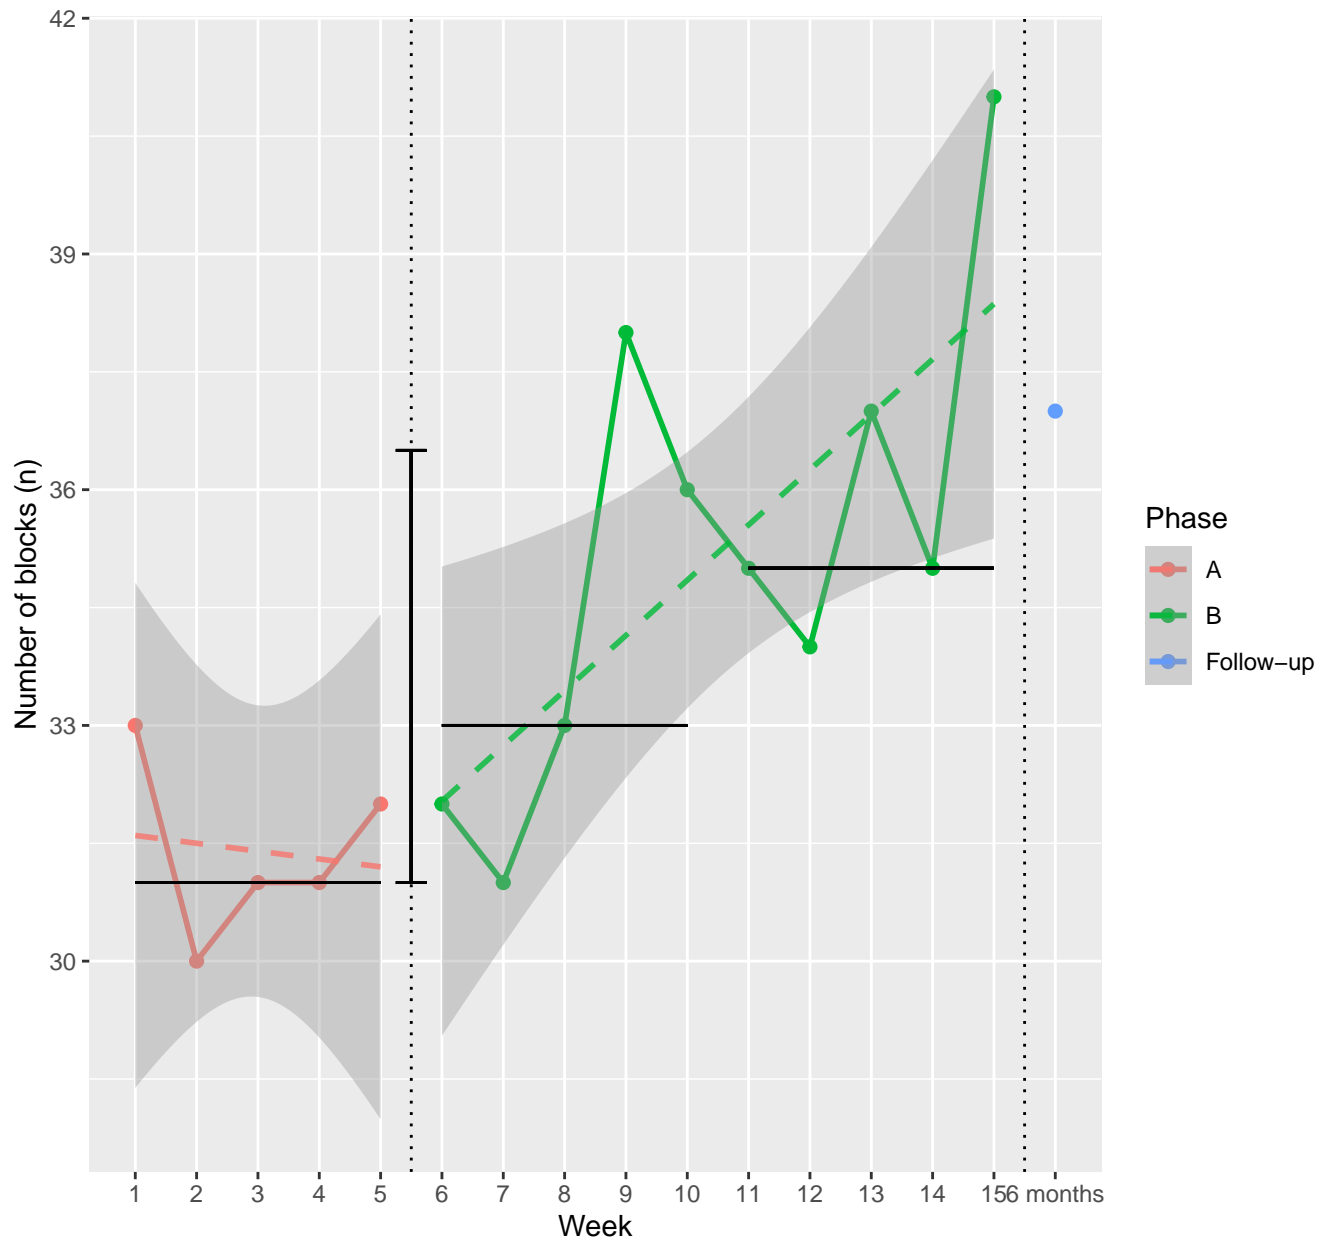

# P5 ABILHAND

ABILHAND MCID = 0.26–0.35

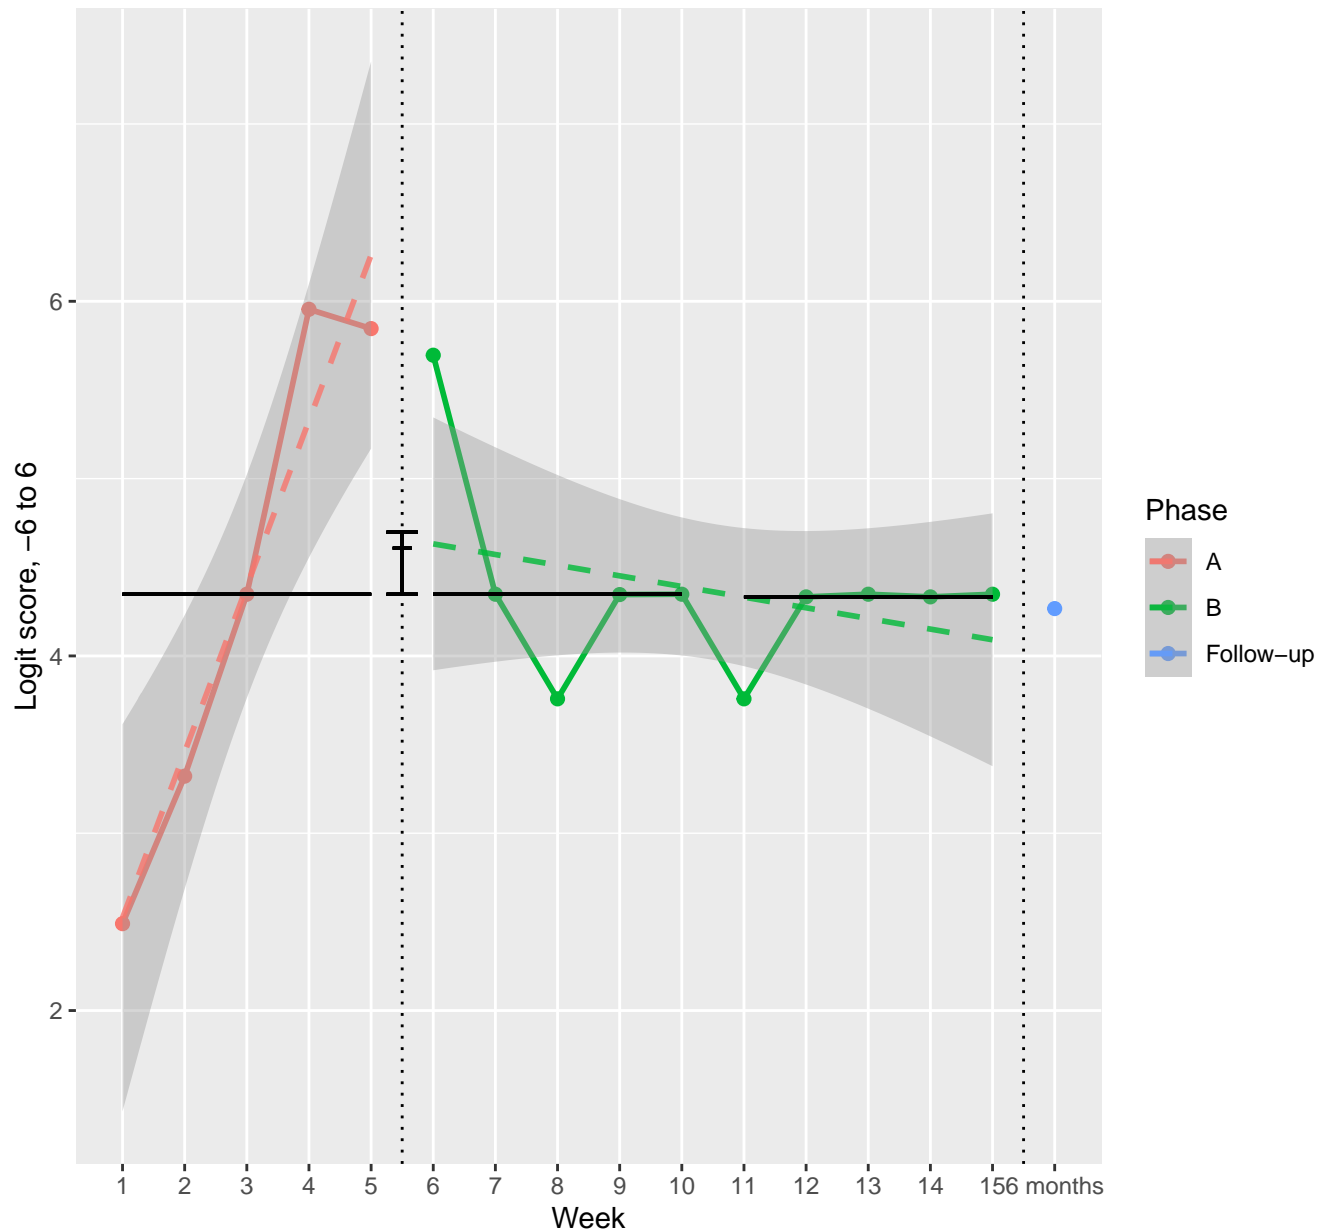

# P5 KinTMT

KinTMT MCID = 2.4

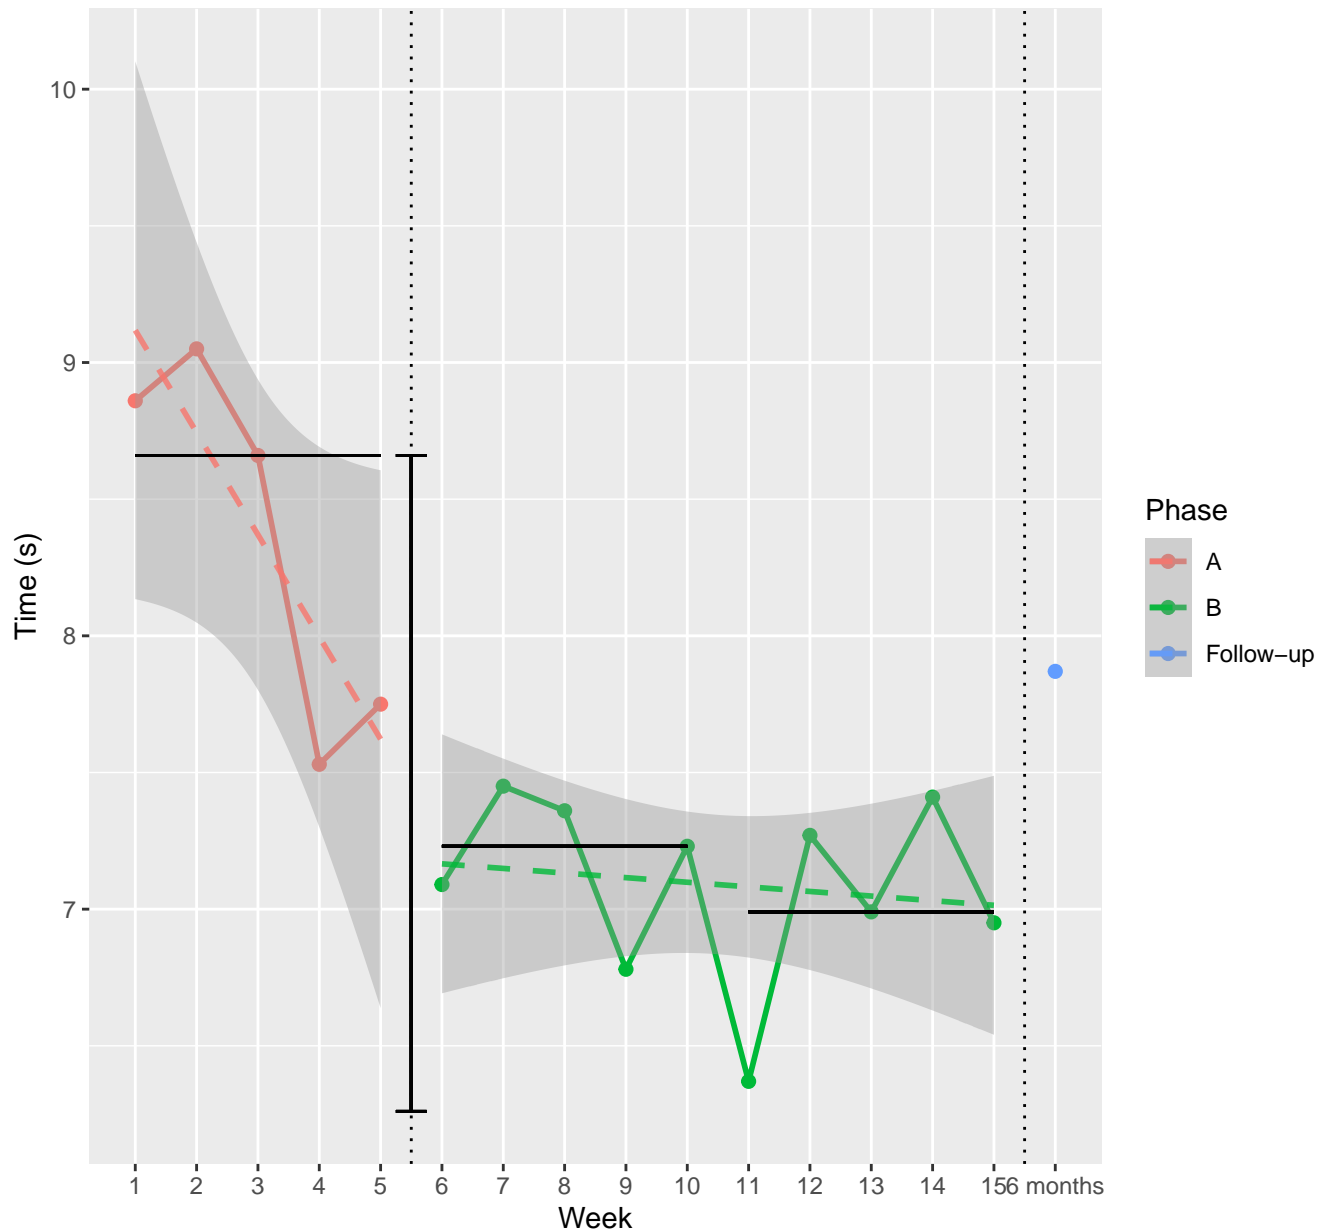

# P5 KinNMU

KinNMU MCID = 3.3

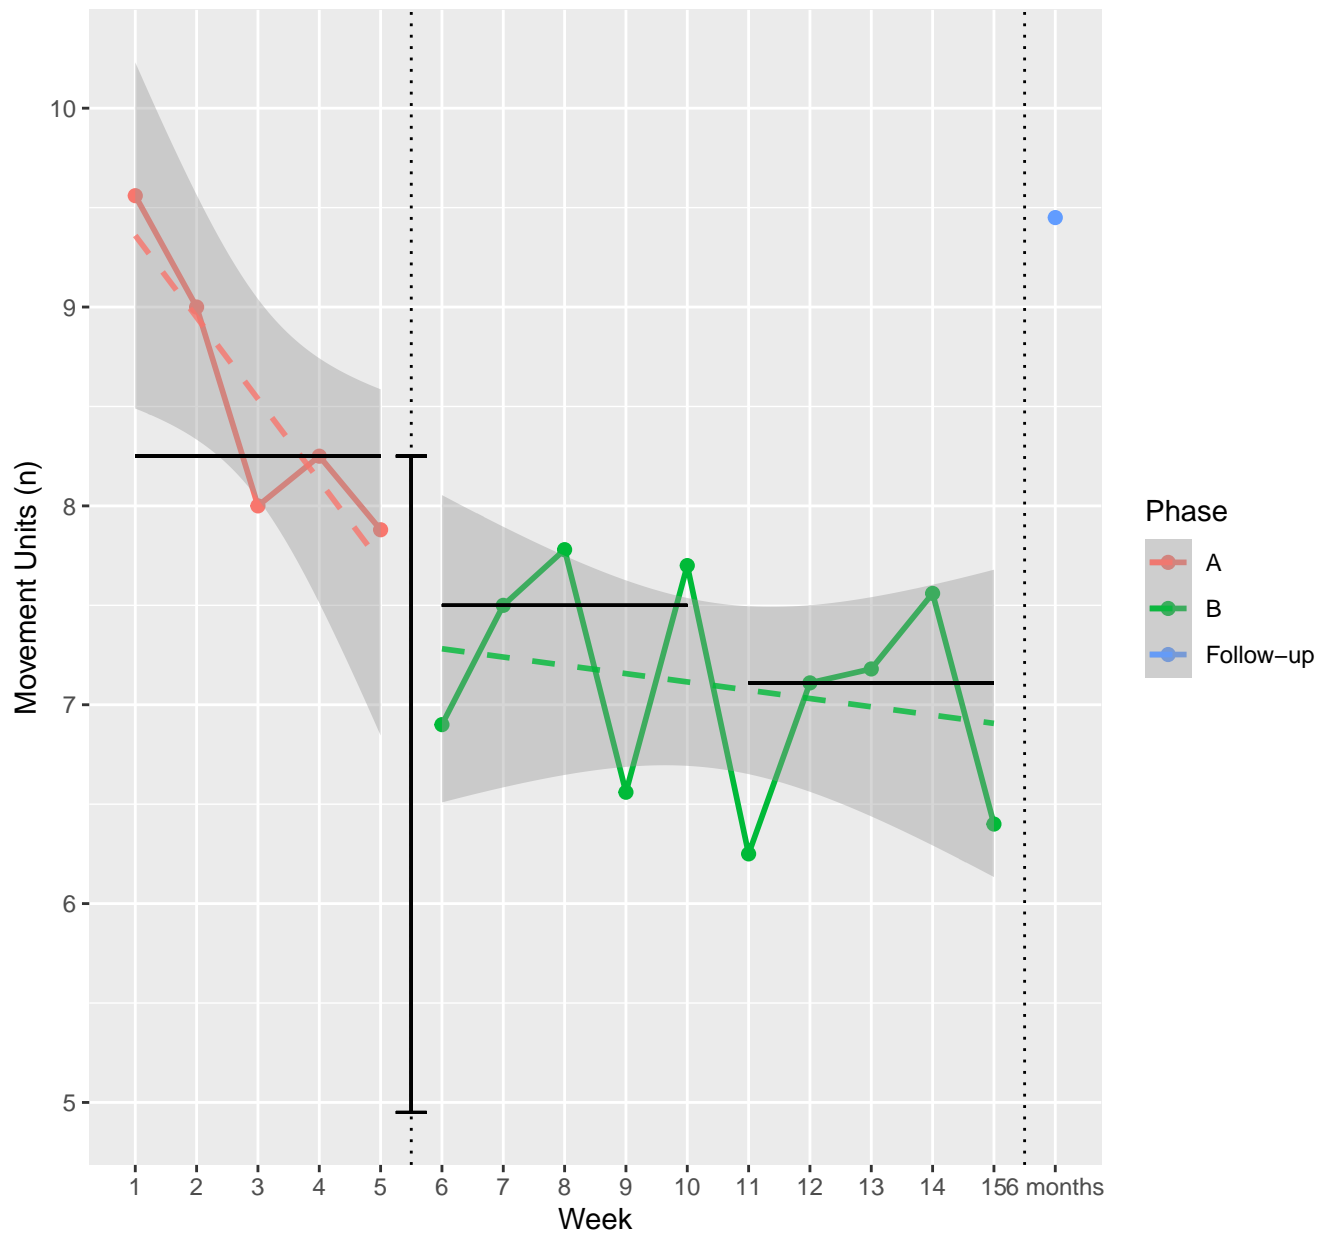

P5 KinTD

KinTD MCID = 2.0

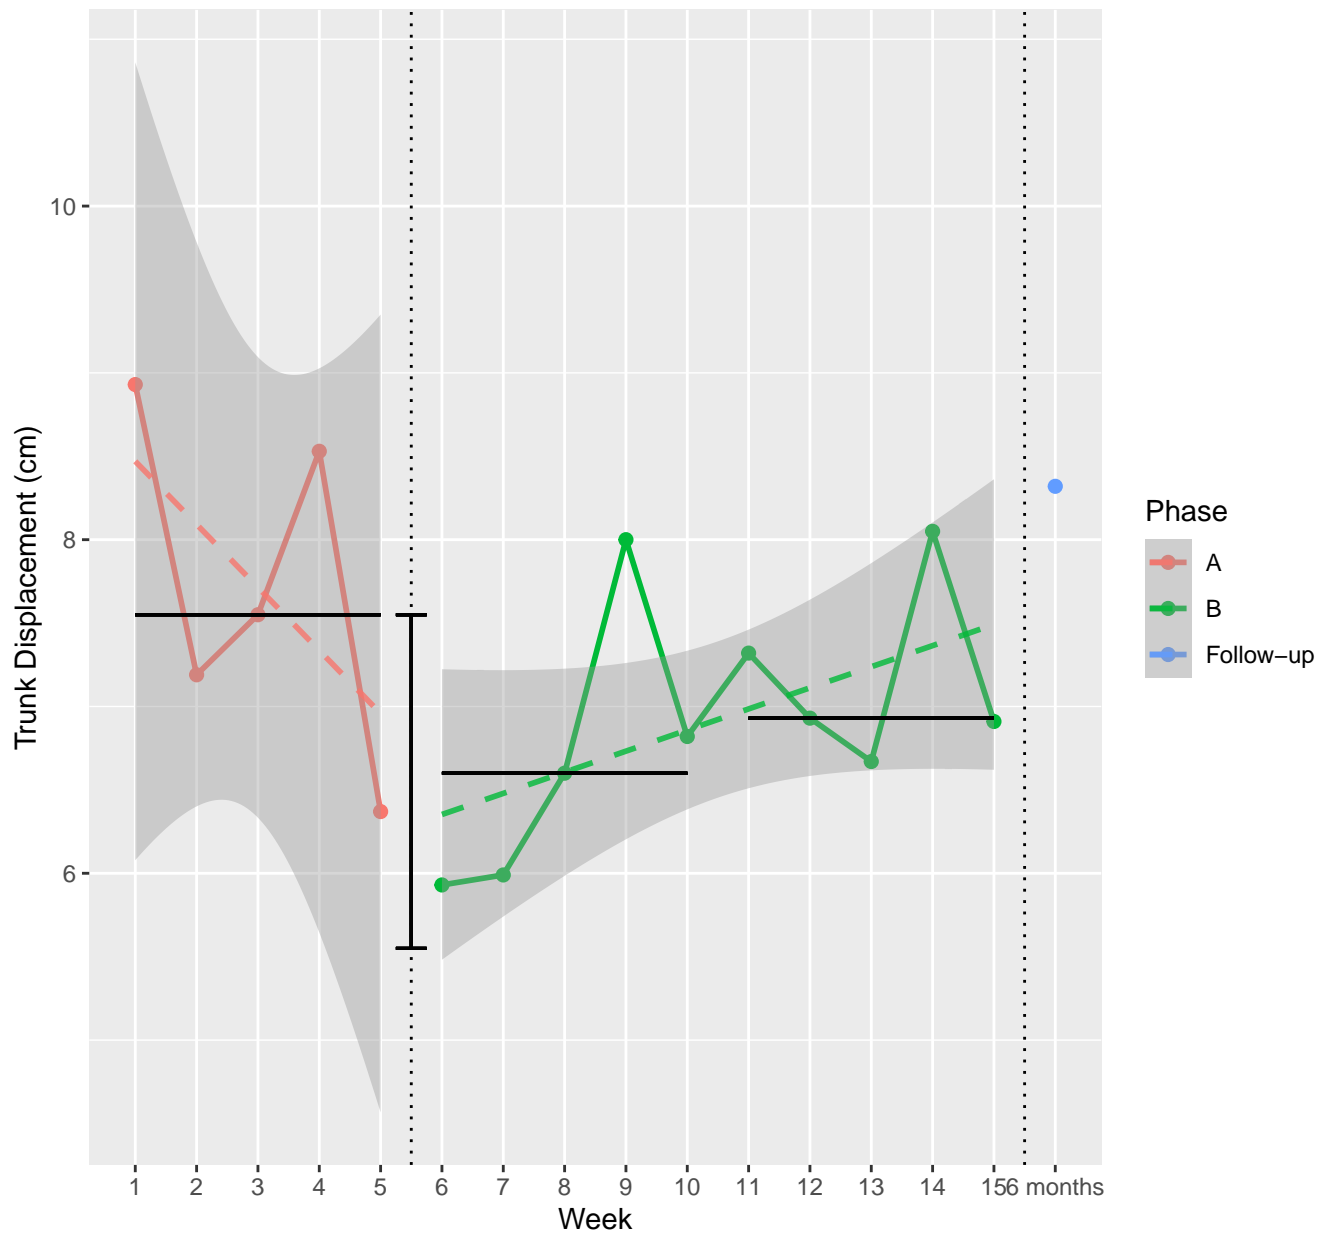



# P6 ARAT

ARAT MCID = 5.7

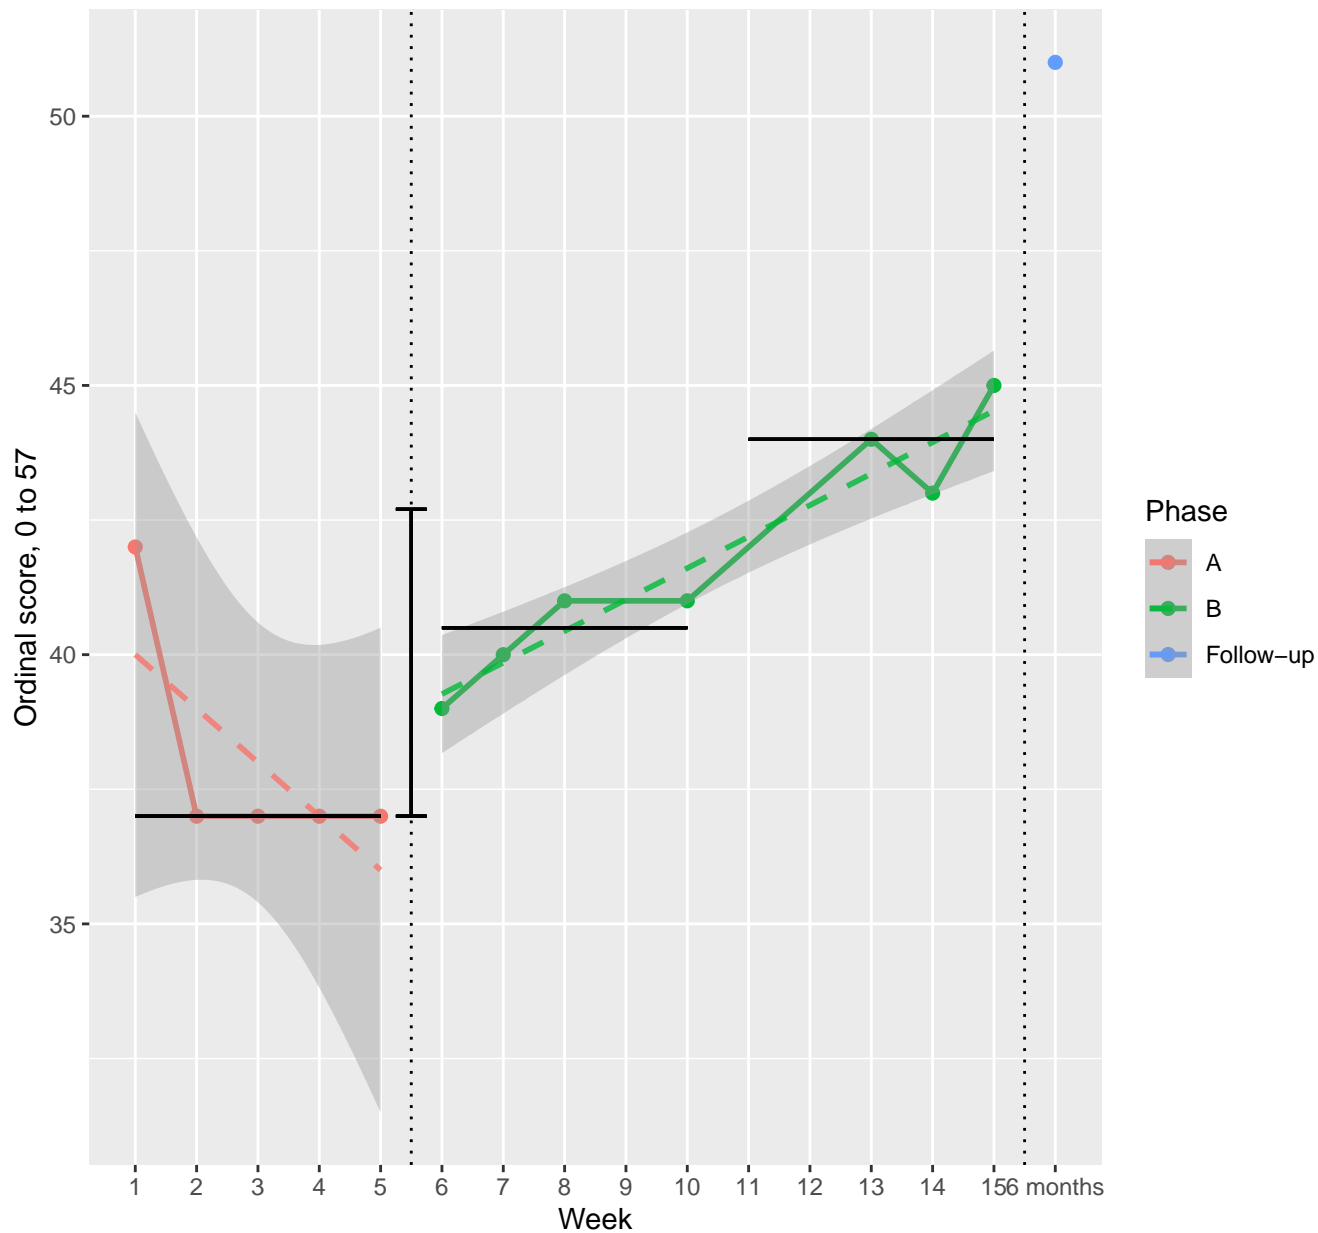

P6 BBT

BBT MCD = 5.5

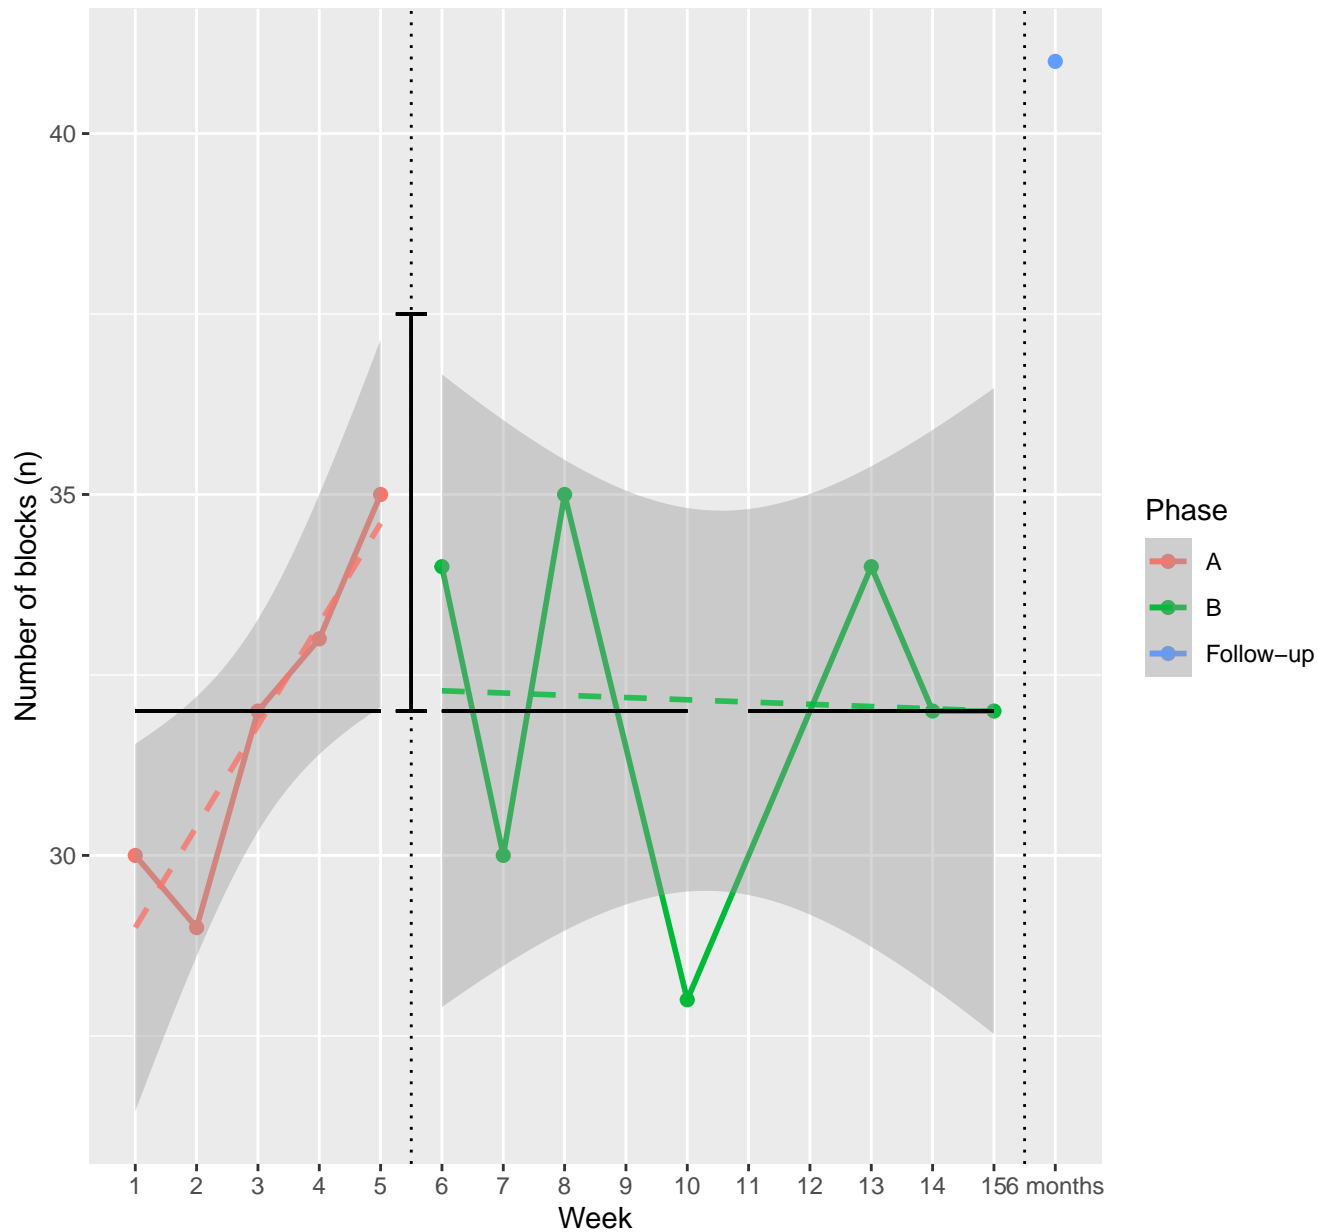

# P6 ABILHAND

ABILHAND MCID = 0.26–0.35

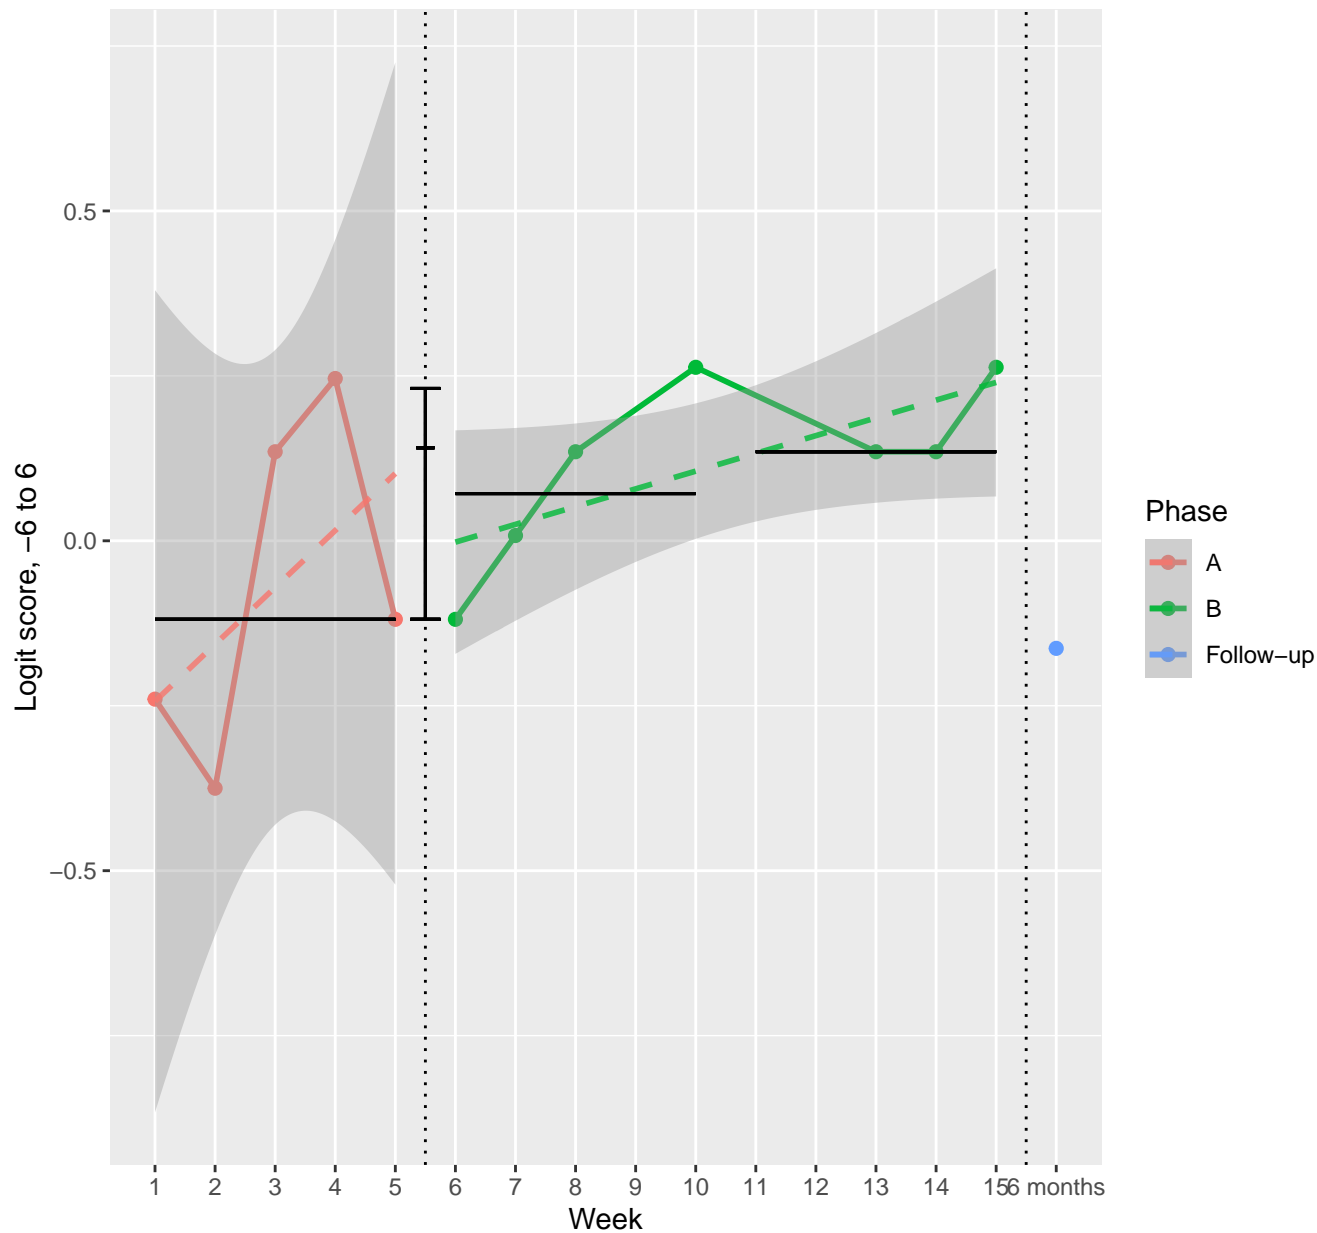

# P6 KinTMT

KinTMT MCID = 2.4

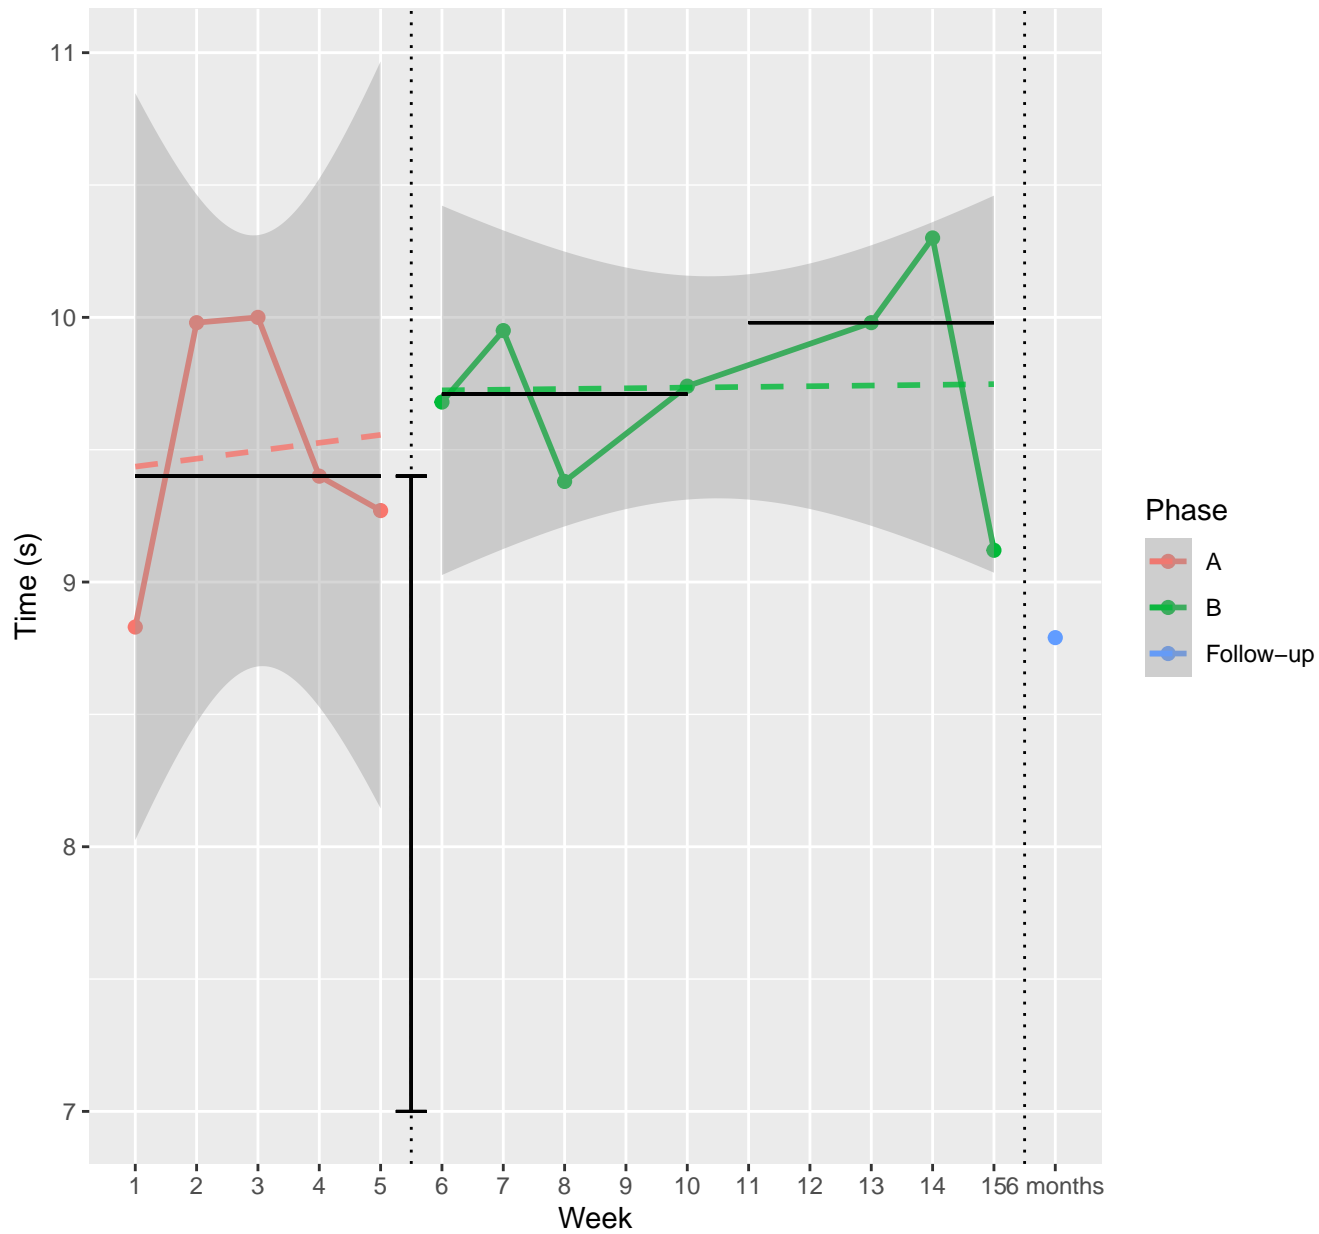

# P6 KinNMU

KinNMU MCID = 3.3

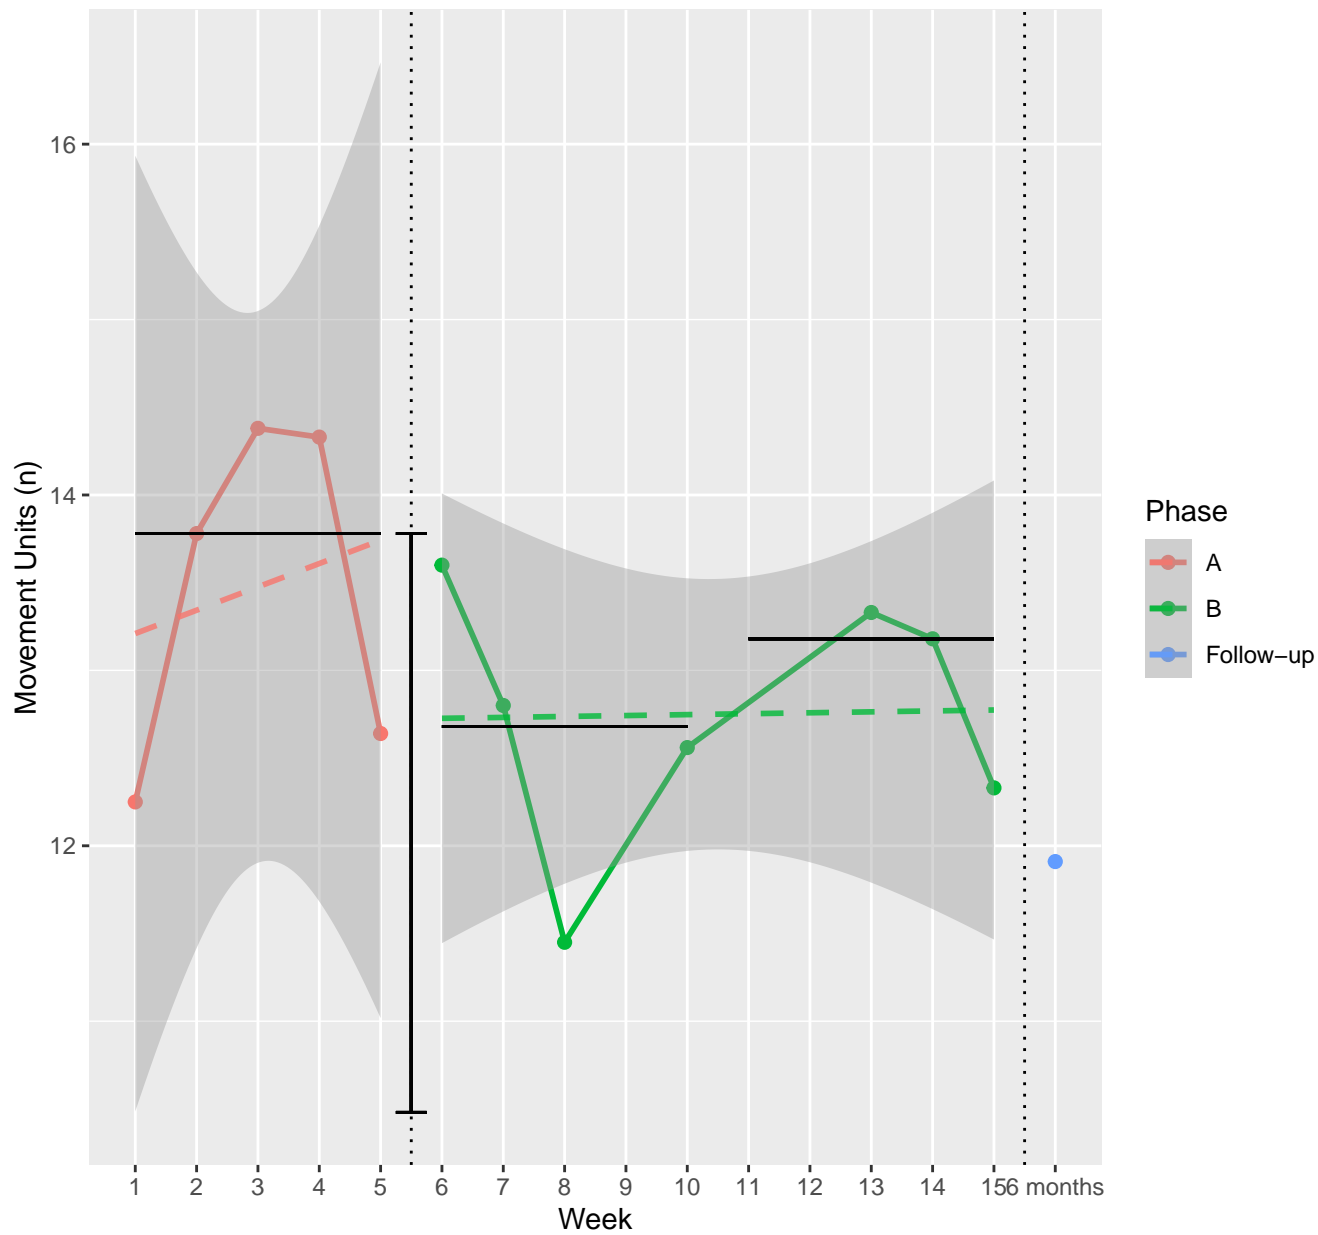

# P6 KinTD

KinTD MCID = 2.0

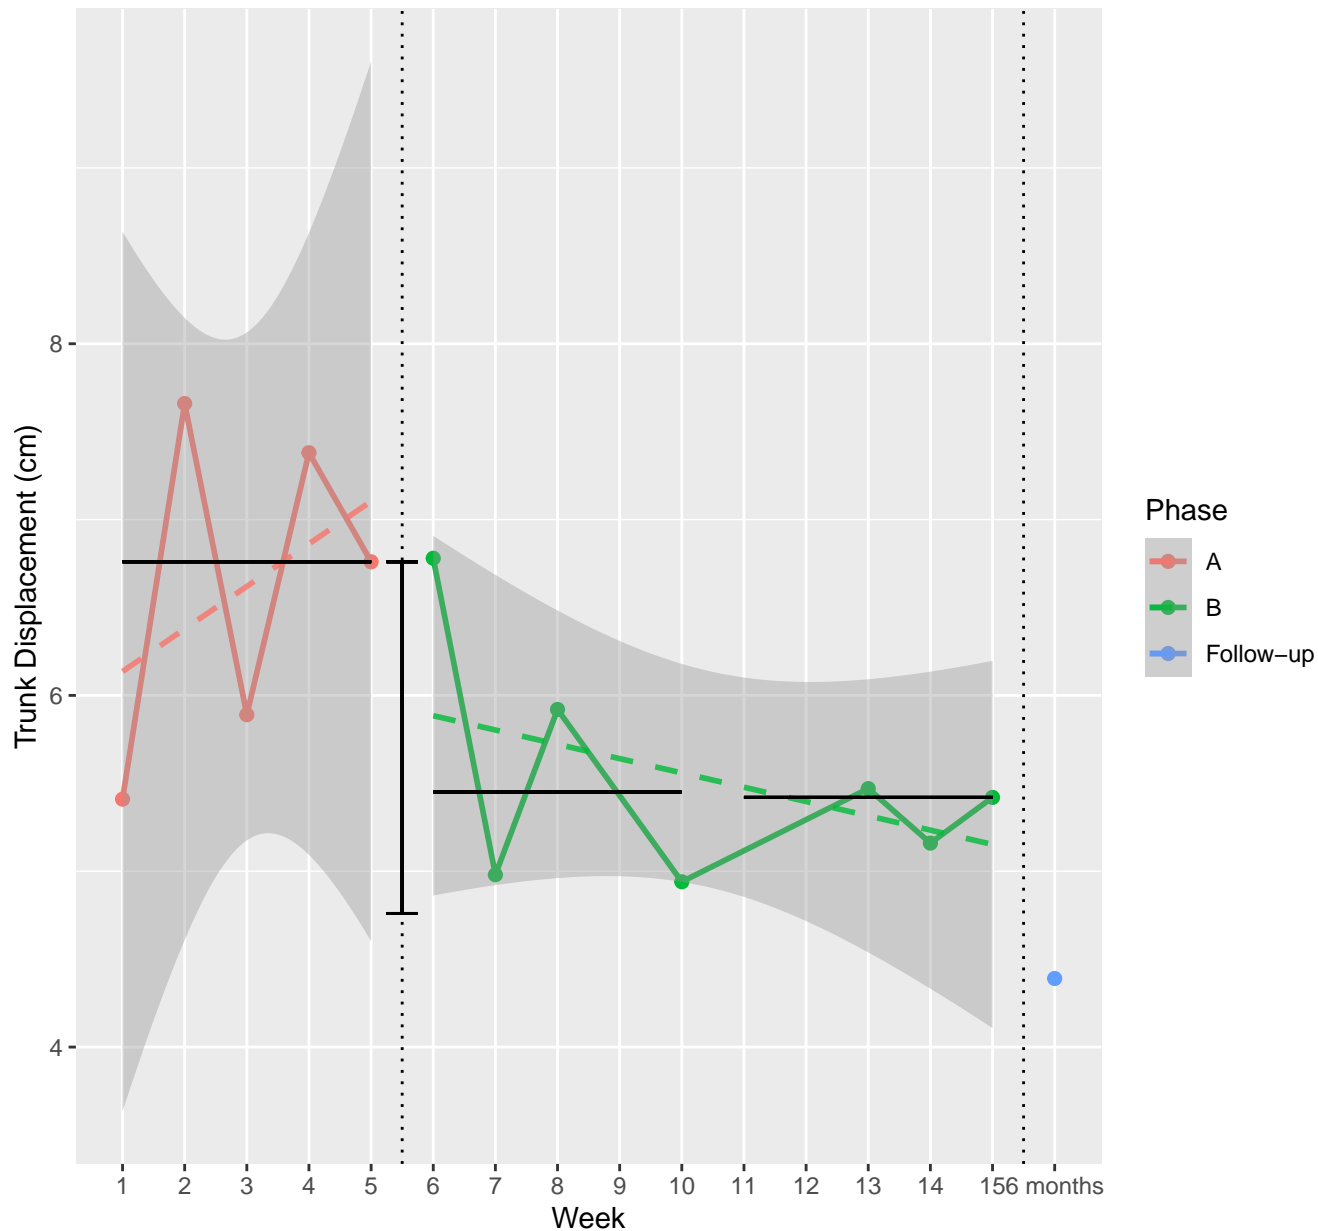

# P7 ARAT

ARAT MCID = 5.7

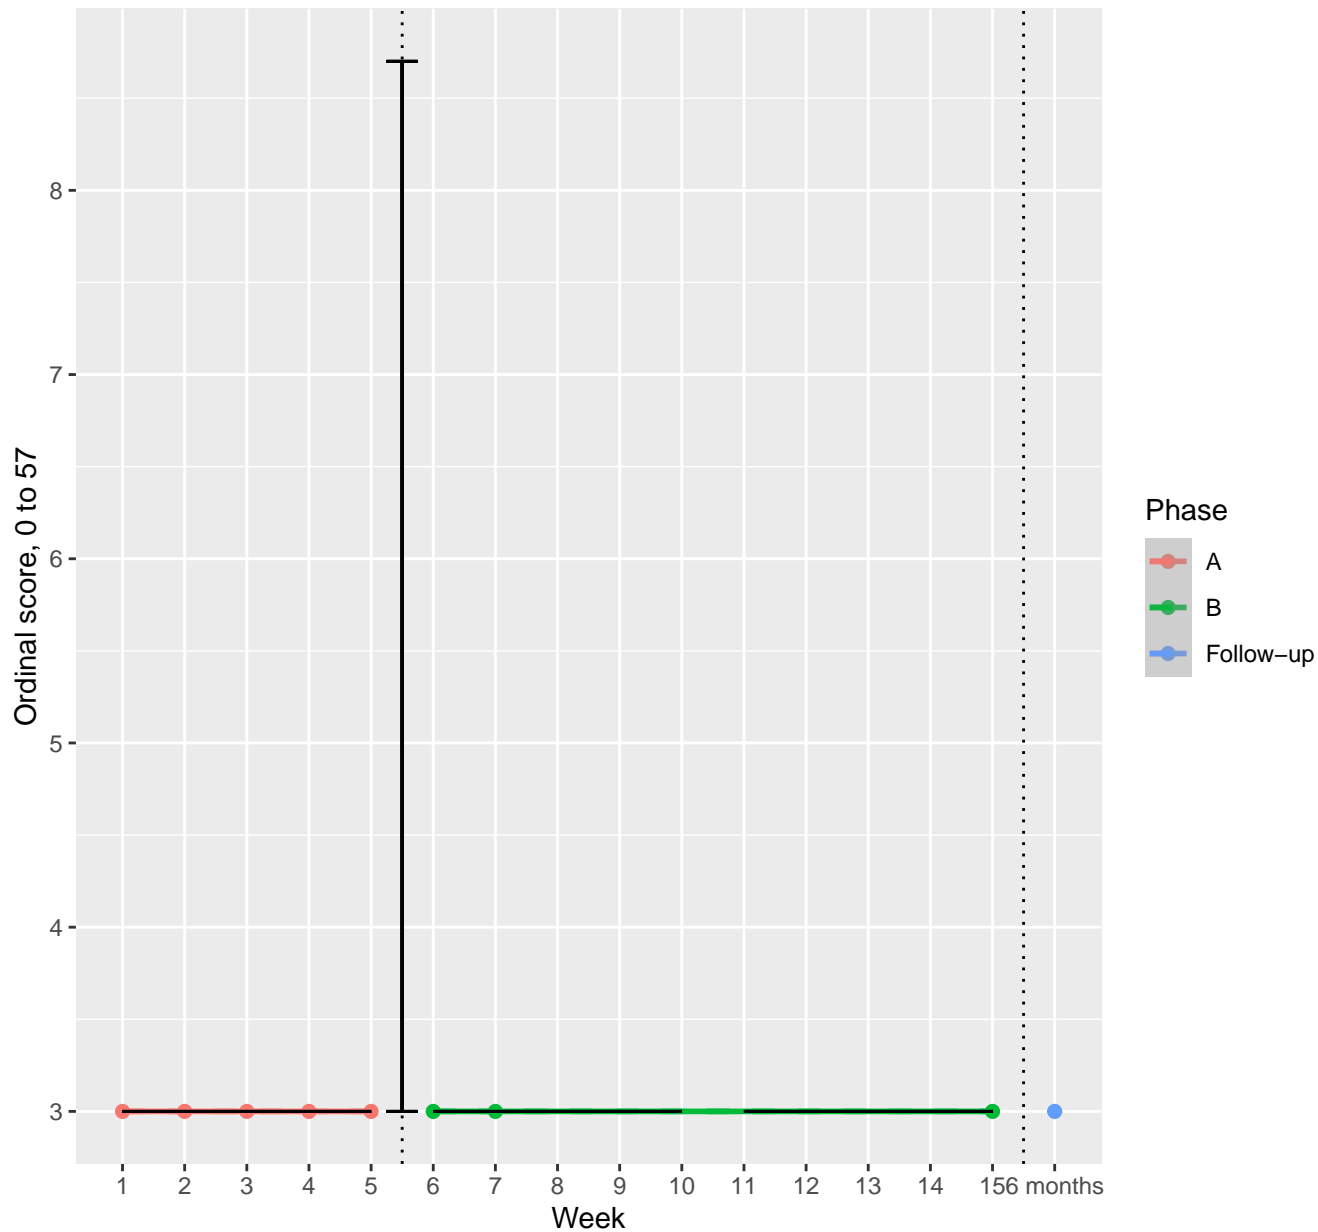

# P7 BBT

BBT MCD = 5.5

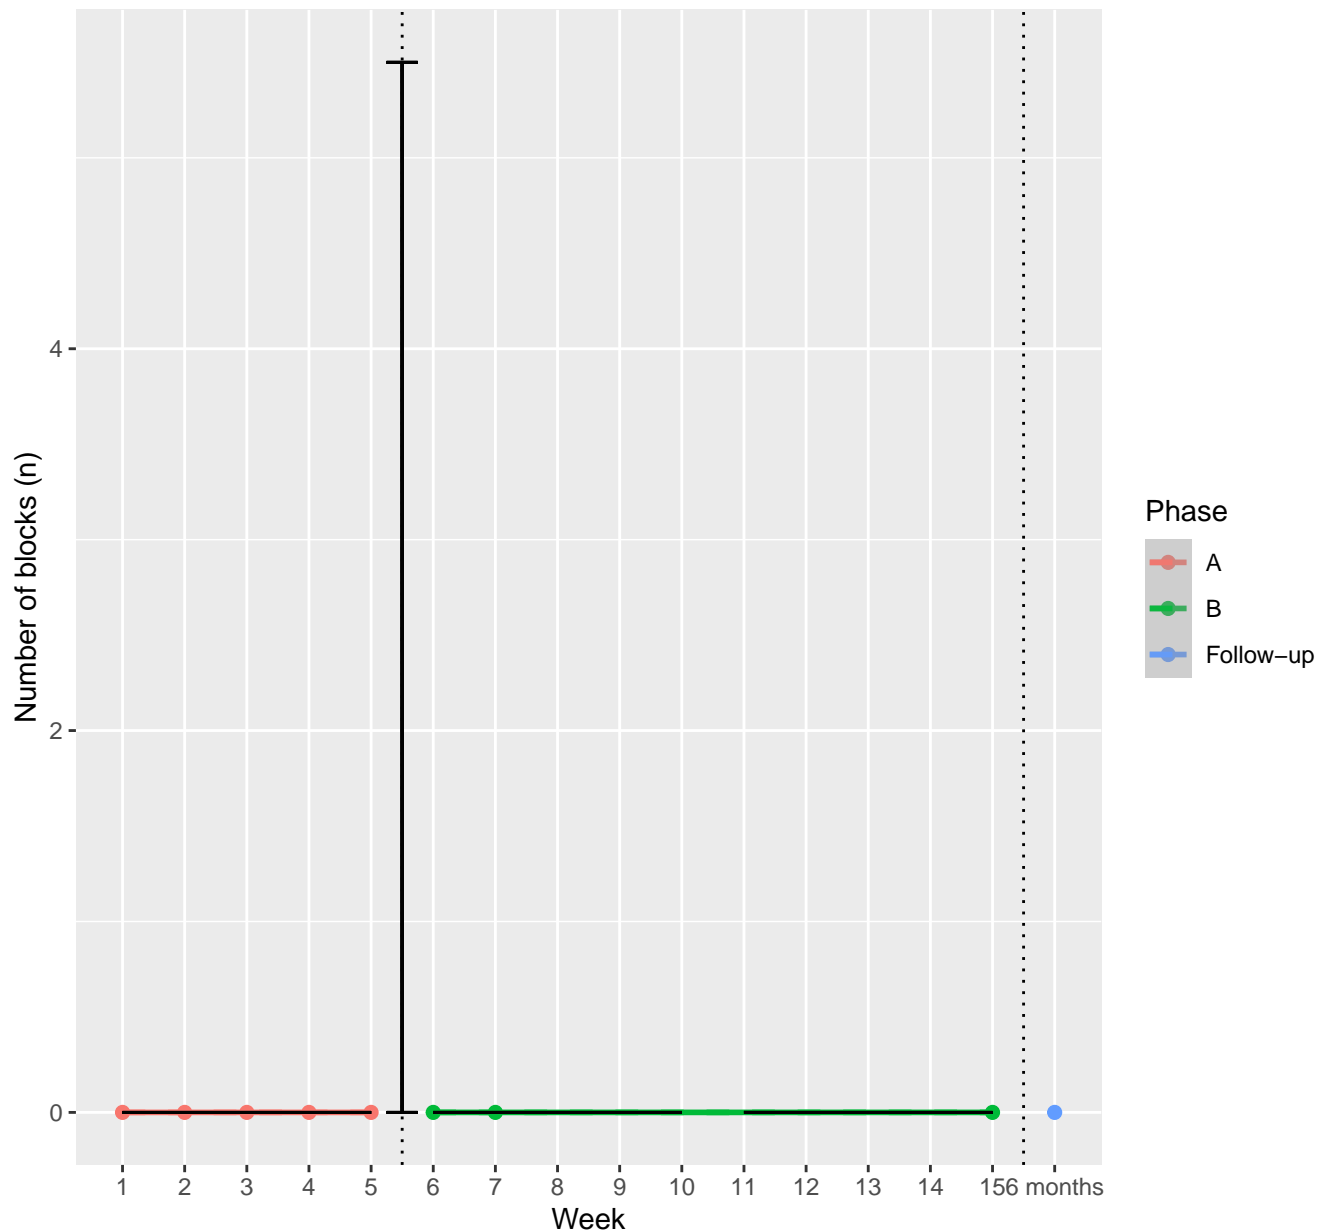



# P7 ABILHAND

ABILHAND MCID = 0.26–0.35

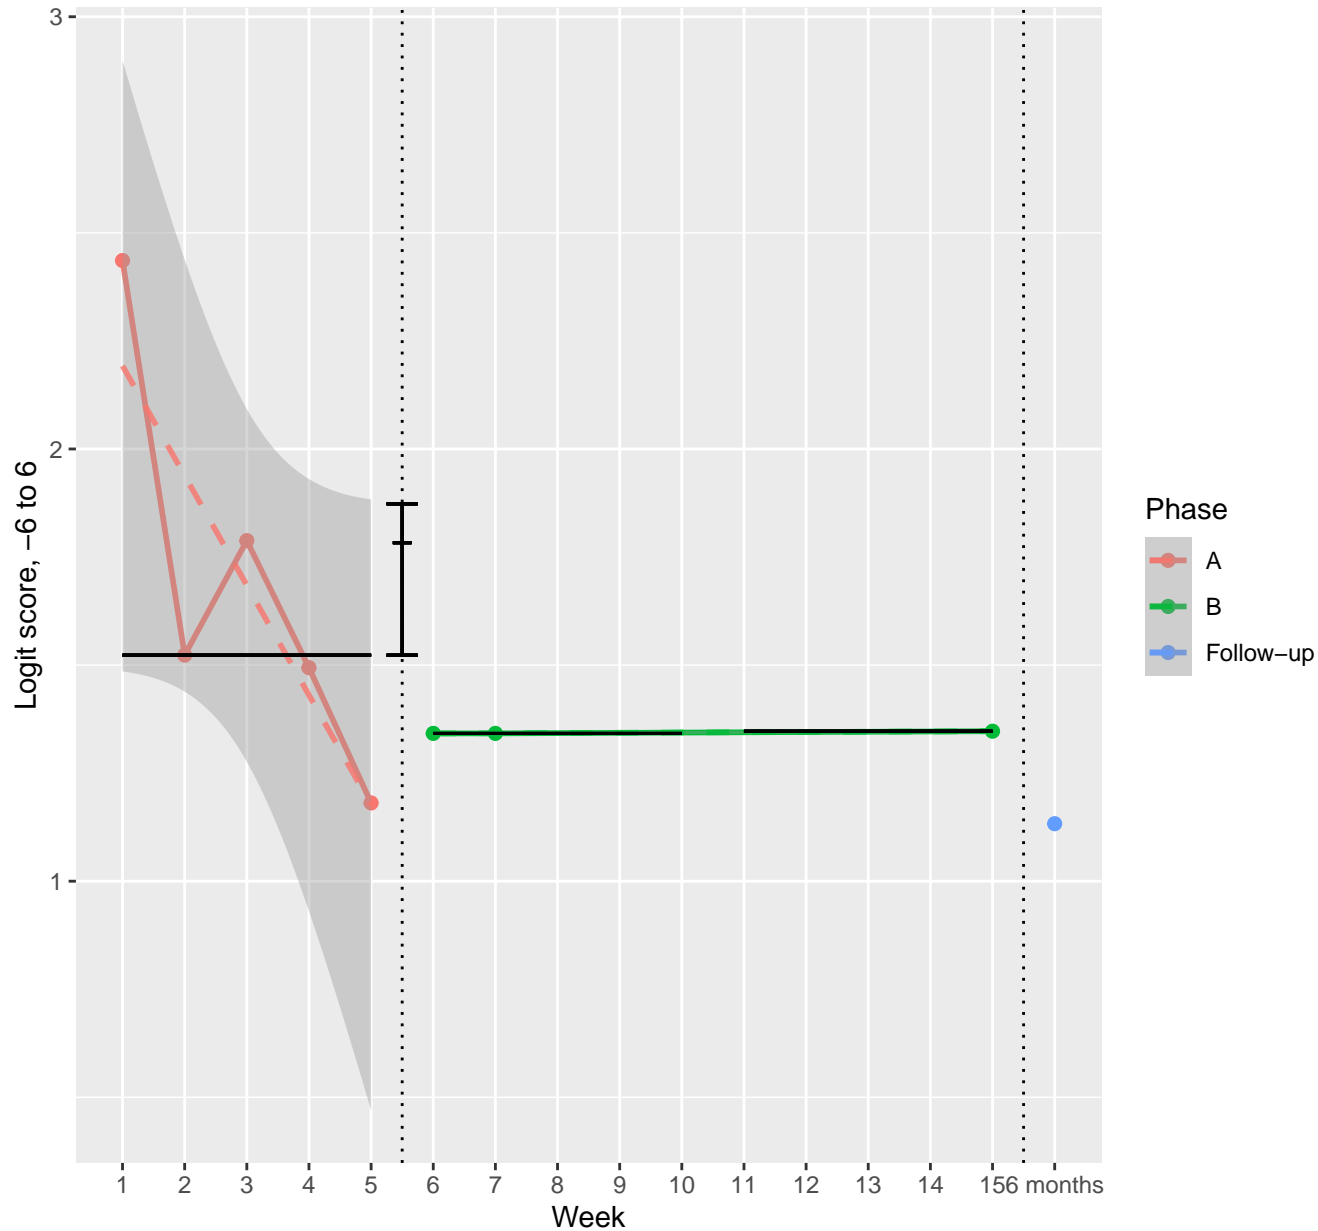

Supplement: 12984_2020_788_MOESM5_ESM.pdf [file 12984_2020_788_MOESM5_ESM.pdf]
